# Supplementary material for: Deletion of low molecular weight protein tyrosine phosphatase (Acp1) protects against stress‐induced cardiomyopathy
Source: PubMed Central journal article supplement — J Pathol. 2015 Sep 1;237(4):482–94. doi: 10.1002/path.4594 (PMC5049627; doi:10.1002/path.4594), 2015-09-01
Supplement: PATH-237-482-s010.pdf [file PATH-237-482-s010.pdf]

**Supplementary Table 1.** Resting cardiac dimensions and function evaluated in 2-month-old mice by echocardiography. The data show that the measured chamber dimensions and functional parameters were similar in rested *Acp1*<sup>+/+</sup> and <sup>-/-</sup> mice (n=5). VST: ventriculum septum thickness; EDD: end diastolic diameter; PWT: posterior wall thickness; ESD: end systolic diameter, HR: heart rate; LV FS: left ventricular fractional shortening; Vcf: velocity of circumferential fiber shortening; LV EF: left ventricular ejection fraction; LV mass: left ventricular mass; BW: body weight.

|                                  |                | Age<br>(Months) | VST<br>(mm) | EDD<br>(mm) | PWT<br>(mm) | ESD<br>(mm) | HR<br>(beat/min) | LV FS<br>(%) | Vcf<br>(circ/s) | Lv EF<br>(%) | Lv mass<br>(calculated) | BW    | LV/BW |
|----------------------------------|----------------|-----------------|-------------|-------------|-------------|-------------|------------------|--------------|-----------------|--------------|-------------------------|-------|-------|
| <b><i>Acp1</i><sup>+/+</sup></b> | Average        | 2.02            | 0.60        | 3.61        | 0.58        | 2.01        | 465.45           | 44.67        | 7.66            | 80.63        | 67.08                   | 22.01 | 3.04  |
|                                  | s.e.m          | 0.03            | 0.02        | 0.09        | 0.02        | 0.17        | 19.02            | 3.31         | 0.54            | 3.73         | 4.95                    | 0.79  | 0.17  |
| <b><i>Acp1</i><sup>-/-</sup></b> | Average        | 1.99            | 0.59        | 3.66        | 0.55        | 2.23        | 473.41           | 39.95        | 6.75            | 75.61        | 66.28                   | 22.36 | 2.99  |
|                                  | s.e.m          | 0.02            | 0.02        | 0.16        | 0.02        | 0.24        | 15.67            | 3.95         | 0.76            | 4.39         | 4.19                    | 0.94  | 0.20  |
|                                  | <i>p</i> value | 0.416           | 0.687       | 0.825       | 0.472       | 0.479       | 0.752            | 0.378        | 0.353           | 0.401        | 0.904                   | 0.785 | 0.853 |
