# Supplementary material for: Deletion of low molecular weight protein tyrosine phosphatase (Acp1) protects against stress‐induced cardiomyopathy
Source: PubMed Central journal article supplement — J Pathol. 2015 Sep 1;237(4):482–94. doi: 10.1002/path.4594 (PMC5049627; doi:10.1002/path.4594), 2015-09-01
Supplement: PATH-237-482-s011.pdf [file PATH-237-482-s011.pdf]

**Supplementary Table 2.** Weights of the mice (BW), hearts, left atria (LA), right atria (RA), left ventricle (LV), right ventricle (RV), liver, and tibia length are similar in *Acp1*<sup>+/+</sup> and <sup>-/-</sup> mice at 8 weeks of age under basal condition (n=4).

|                                  |                | <b>BW (g)</b> | <b>Heart (mg)</b> | <b>LA (mg)</b> | <b>RA (mg)</b> | <b>LV (mg)</b> | <b>RV (mg)</b> | <b>liver (mg)</b> | <b>Tibia (mm)</b> | <b>HW/BW</b> | <b>HW/Tibia Length</b> |
|----------------------------------|----------------|---------------|-------------------|----------------|----------------|----------------|----------------|-------------------|-------------------|--------------|------------------------|
| <b><i>Acp1</i><sup>+/+</sup></b> | Average        | 21.10         | 110.48            | 3.50           | 3.15           | 78.68          | 25.15          | 1152.50           | 21.33             | 5.25         | 5.18                   |
|                                  | s.e.m          | 2.03          | 4.35              | 1.31           | 1.05           | 3.19           | 2.68           | 13.15             | 1.59              | 0.42         | 2.74                   |
| <b><i>Acp1</i><sup>-/-</sup></b> | Average        | 19.94         | 103.88            | 2.55           | 3.33           | 77.68          | 20.33          | 1049.50           | 20.75             | 5.20         | 5.01                   |
|                                  | s.e.m          | 1.14          | 3.11              | 1.00           | 0.71           | 2.95           | 1.60           | 12.08             | 0.71              | 0.39         | 4.39                   |
|                                  | <i>p value</i> | 0.624         | 0.565             | 0.383          | 0.788          | 0.886          | 0.277          | 0.399             | 0.729             | 0.684        | 0.775                  |
