# Supplementary material for: Deletion of low molecular weight protein tyrosine phosphatase (Acp1) protects against stress‐induced cardiomyopathy
Source: PubMed Central journal article supplement — J Pathol. 2015 Sep 1;237(4):482–94. doi: 10.1002/path.4594 (PMC5049627; doi:10.1002/path.4594), 2015-09-01
Supplement: PATH-237-482-s012.pdf [file PATH-237-482-s012.pdf]

**Supplementary Table 3.** Microarray data showing 146 differentially expressed genes (90 were down-regulated and 56 were up-regulated) in *Acp1*<sup>-/-</sup> sham hearts versus *Acp1*<sup>+/+</sup> sham hearts (*n* = 2). Only genes expression with fold changes  $\geq 1.5$  (up-regulated) or  $\leq -1.5$  (down-regulated) and p-value  $< 0.05$  were considered statistically significant.

| RefSeq Transcript ID | Gene Symbol | p-value<br>(- /- sham vs. +/+ sham) | Fold-change<br>(- /- sham vs. +/+ sham) |
|----------------------|-------------|-------------------------------------|-----------------------------------------|
| NM_021282            | Cyp2e1      | 0.0492704                           | -3.08077                                |
| NM_011331            | Ccl12       | 0.00911971                          | -2.70749                                |
| NM_013692            | Klf10       | 0.0483192                           | -1.98939                                |
| NM_173753            | Fnip1       | 0.00300355                          | -1.95621                                |
| ---                  | ---         | 0.0174537                           | -1.88829                                |
| ---                  | BB144871    | 0.0383273                           | -1.86071                                |
| NM_001163628         | Lym5        | 0.00785658                          | -1.84841                                |
| NM_027534            | Kdsr        | 0.000942838                         | -1.84116                                |
| NM_010578            | Itgb1       | 0.00547123                          | -1.79231                                |
| NM_008969            | Ptgs1       | 0.0201486                           | -1.77447                                |
| NM_008966            | Ptgfr       | 0.00374265                          | -1.70366                                |
| NM_013843            | Zfp53       | 0.00772355                          | -1.69091                                |

|              |               |            |          |
|--------------|---------------|------------|----------|
| ---          | BB182297      | 0.00650441 | -1.68691 |
| NM_130860    | Cdk9          | 0.00461476 | -1.67835 |
| ---          | D030020J04Rik | 0.022826   | -1.67337 |
| ---          | AI616248      | 0.00470791 | -1.66804 |
| NM_001040669 | Gm10058       | 0.00424226 | -1.66753 |
| NM_001113527 | lsg20         | 0.0322474  | -1.66051 |
| NM_145570    | Fam176a       | 0.00355675 | -1.66039 |
| NR_027388    | 1700096K18Rik | 0.00343505 | -1.65825 |
| NM_001163791 | Orc6          | 0.0160189  | -1.64414 |
| NM_175499    | Slitrk6       | 0.0175983  | -1.64281 |
| NM_026125    | Fam132a       | 0.0244489  | -1.64085 |
| NM_001101510 | Susd5         | 0.00128321 | -1.63962 |
| ---          | ---           | 0.0440854  | -1.63931 |
| ---          | ---           | 0.0167805  | -1.6385  |
| ---          | ---           | 0.0111401  | -1.63692 |
| NM_001001130 | Zfp273        | 0.0388213  | -1.63373 |
| NM_001033300 | Gmps          | 0.0183971  | -1.62129 |
| ---          | ---           | 0.0227572  | -1.61882 |

|              |              |             |          |
|--------------|--------------|-------------|----------|
| NM_028443    | Fam101a      | 0.000939414 | -1.61648 |
| ---          | BC026600     | 0.0462802   | -1.61043 |
| NM_001177795 | Rgs20        | 0.0384901   | -1.6097  |
| NM_025695    | Smc6         | 0.0205859   | -1.60862 |
| NM_001033441 | Alg10b       | 0.000504174 | -1.60645 |
| NM_001168392 | Ramp1        | 0.0238384   | -1.60202 |
| ---          | ---          | 0.00349618  | -1.6019  |
| NM_001024135 | Kbtbd7       | 0.0133242   | -1.59863 |
| NM_025637    | Rwdd3        | 0.00865255  | -1.59644 |
| NM_027326    | Mllt3        | 0.0191068   | -1.59633 |
| NM_010170    | F2r12        | 0.00315146  | -1.59615 |
| NM_023266    | Zfp120       | 0.010077    | -1.59484 |
| XM_003085092 | LOC100503807 | 0.0422169   | -1.5921  |
| NM_001004066 | Zfp386       | 0.017371    | -1.58654 |
| NM_009767    | Chic1        | 0.0420266   | -1.58564 |
| ---          | ---          | 0.0303411   | -1.58378 |
| ---          | ---          | 0.00576683  | -1.58138 |
| NM_001185002 | Rhox13       | 0.0322873   | -1.58025 |

|              |               |            |          |
|--------------|---------------|------------|----------|
| NM_020283    | B3galt1       | 0.0337955  | -1.57937 |
| NM_011044    | Pck1          | 0.014042   | -1.57868 |
| NM_021284    | Kras          | 0.002428   | -1.57658 |
| NM_021495    | Pvr13         | 0.00205013 | -1.57449 |
| NM_011158    | Prkar2b       | 0.00818178 | -1.5693  |
| NM_009250    | Serpini1      | 0.0492005  | -1.56572 |
| NM_025959    | Psmc6         | 0.0100122  | -1.56484 |
| NM_199009    | Fam160a2      | 0.0210779  | -1.5618  |
| NM_144902    | Slc35a3       | 0.0271052  | -1.56089 |
| ---          | ---           | 0.03787    | -1.55981 |
| NM_178753    | Spin4         | 0.0214985  | -1.55951 |
| NM_010419    | Hes5          | 0.0423693  | -1.55725 |
| ---          | 2310076G05Rik | 2.23E-06   | -1.55494 |
| NM_178642    | Ano1          | 0.00400708 | -1.55471 |
| NM_001039154 | Cdh8          | 0.00215667 | -1.55234 |
| NM_029823    | 2900062L11Rik | 0.0186702  | -1.54736 |
| NM_175480    | Zfp612        | 0.0326323  | -1.54684 |
| NM_008339    | Cd79b         | 0.030667   | -1.54522 |

|              |               |             |          |
|--------------|---------------|-------------|----------|
| ---          | ---           | 0.00215959  | -1.54467 |
| NM_001164411 | Cnot4         | 0.0105855   | -1.54452 |
| ---          | ---           | 0.0357753   | -1.54429 |
| NR_015524    | 4932415G12Rik | 0.0333504   | -1.54394 |
| NM_172393    | Aim1          | 0.000530088 | -1.54372 |
| NM_001081477 | Brwd3         | 0.035336    | -1.5373  |
| NM_052994    | Spock2        | 0.030209    | -1.53264 |
| NM_001159717 | 2-Sep         | 0.0144684   | -1.53175 |
| NM_030732    | Tbl1xr1       | 0.0165542   | -1.53058 |
| ---          | ---           | 0.0145219   | -1.52997 |
| NM_028754    | 0610037L13Rik | 0.00239059  | -1.52398 |
| NM_001163311 | Srr           | 0.00288294  | -1.51916 |
| ---          | ---           | 0.0266176   | -1.51656 |
| NM_001195031 | Pag1          | 0.00290914  | -1.51579 |
| NM_001017427 | Rasef         | 0.00342879  | -1.51558 |
| ---          | ---           | 0.0157119   | -1.51435 |
| NM_028608    | Glipr1        | 0.0185007   | -1.51364 |
| NM_146241    | Trhde         | 0.0184482   | -1.51321 |

|              |               |             |          |
|--------------|---------------|-------------|----------|
| ---          | AI956758      | 0.037251    | -1.51242 |
| NM_011075    | Abcb1b        | 0.0182047   | -1.5091  |
| NM_009531    | Xpc           | 0.0129345   | -1.50822 |
| ---          | ---           | 0.0374492   | -1.50598 |
| NM_199062    | Zfp781        | 0.0290842   | -1.50578 |
| NR_033608    | 1700084J12Rik | 0.0250257   | -1.50022 |
| NM_026004    | Nt5c3         | 0.026226    | 1.50026  |
| NM_010207    | Fgfr2         | 0.0154401   | 1.50167  |
| ---          | 1110003F02Rik | 0.0368397   | 1.5055   |
| NM_175260    | Myh10         | 0.022407    | 1.50633  |
| ---          | ---           | 0.00947763  | 1.50635  |
| NM_001039482 | Klh20         | 0.00907836  | 1.50742  |
| NM_009181    | St8sia2       | 0.00325648  | 1.50907  |
| NM_001109657 | Gas7          | 0.0171729   | 1.50945  |
| ---          | Tcrg-V1       | 0.0351432   | 1.50997  |
| NM_172919    | Zfp846        | 0.00113518  | 1.5107   |
| NM_133913    | Chpf2         | 0.000351411 | 1.51149  |
| NM_010288    | Gja1          | 0.0381463   | 1.51319  |

|              |               |             |         |
|--------------|---------------|-------------|---------|
| NM_021275    | Kcna4         | 0.000145535 | 1.5215  |
| NM_029465    | Clec4g        | 0.00520004  | 1.52449 |
| NM_001025612 | Snx22         | 0.00088512  | 1.52512 |
| ---          | ---           | 0.00292912  | 1.52534 |
| ---          | ---           | 0.0293079   | 1.52586 |
| ---          | ---           | 0.00579698  | 1.52821 |
| NM_207215    | Mycbp2        | 0.0422143   | 1.53153 |
| NM_001136060 | Dpp6          | 0.0313216   | 1.53308 |
| XR_105162    | D830044I16Rik | 0.0147442   | 1.53492 |
| NM_028009    | Rpusd1        | 0.0161881   | 1.54811 |
| NM_028091    | Osgepl1       | 0.0219372   | 1.54867 |
| ---          | ---           | 0.0165709   | 1.54882 |
| NM_028041    | Ddx54         | 0.00286047  | 1.54894 |
| NM_001110227 | Kcnj13        | 0.0386405   | 1.55149 |
| NM_001077507 | Gnas          | 0.0031302   | 1.55261 |
| NM_001164561 | Exosc1        | 0.035596    | 1.55457 |
| NM_031869    | Prkab1        | 0.0235665   | 1.55801 |
| NM_020043    | Igdcc4        | 0.00420856  | 1.56093 |

|              |               |             |         |
|--------------|---------------|-------------|---------|
| ---          | ---           | 0.00276271  | 1.56648 |
| NM_011025    | Oxt           | 0.000554551 | 1.56807 |
| NM_001011733 | Olfcr288      | 7.03E-06    | 1.57264 |
| NM_013538    | Cdca3         | 0.0139498   | 1.57474 |
| NR_015504    | 2410018L13Rik | 0.00628238  | 1.57773 |
| NM_016691    | Clcn5         | 0.0317541   | 1.5875  |
| ---          | ---           | 0.0382849   | 1.58988 |
| NM_198654    | Nsl1          | 0.00298953  | 1.59223 |
| NM_016709    | Auh           | 0.00970386  | 1.59235 |
| ---          | C79946        | 0.00085651  | 1.59667 |
| NM_001167967 | Ankrd10       | 0.0292284   | 1.59796 |
| NM_001033355 | Zfp568        | 0.0335257   | 1.60327 |
| NM_008919    | Ppyr1         | 0.00222989  | 1.60509 |
| NM_001110824 | Foxp4         | 0.0148134   | 1.62002 |
| ---          | ---           | 0.00448799  | 1.62124 |
| NM_011484    | Stam          | 0.0120569   | 1.62416 |
| ---          | ---           | 0.0350188   | 1.62794 |
| NM_001038010 | Kat2a         | 0.000116937 | 1.64682 |



|              |               |             |         |
|--------------|---------------|-------------|---------|
| NM_020260    | Arhgap31      | 0.000894779 | 1.6625  |
| NM_007930    | Enc1          | 0.0350976   | 1.66911 |
| ---          | B930053N05Rik | 0.0310161   | 1.69122 |
| NM_001162906 | 2410089E03Rik | 0.00286053  | 1.69711 |
| NM_011779    | Coro1c        | 0.0303127   | 1.71094 |
| NR_033506    | Gm3893        | 0.00314355  | 1.72489 |
| ---          | C78513        | 0.00608809  | 1.76039 |
| NM_001100591 | Rc3h2         | 0.0266002   | 2.07195 |
