# Supplementary material for: Deletion of low molecular weight protein tyrosine phosphatase (Acp1) protects against stress‐induced cardiomyopathy
Source: PubMed Central journal article supplement — J Pathol. 2015 Sep 1;237(4):482–94. doi: 10.1002/path.4594 (PMC5049627; doi:10.1002/path.4594), 2015-09-01
Supplement: PATH-237-482-s013.pdf [file PATH-237-482-s013.pdf]

**Supplementary Table S4.** List of representative up-regulated genes in *Acp1<sup>+/+</sup>* TAC hearts compared with *Acp1<sup>+/+</sup>* sham hearts and their known biological process. Only gene expression with fold changes  $\geq 1.5$  (up-regulated) or  $\leq -1.5$  (down-regulated) and p-value  $< 0.05$  was considered statistically significant (*Acp1<sup>+/+</sup>* Sham, n=2; *Acp1<sup>+/+</sup>* TAC, n=5). The last column in right indicates the validated genes using qPCR and immunoblot analysis, (n=3, p<0.05).

| Gene symbol | Description                                         | Molecular function                              | Biological process in the heart                                          | p-value     | Fold-change | Validation mRNA or protein level (p<0.05) |
|-------------|-----------------------------------------------------|-------------------------------------------------|--------------------------------------------------------------------------|-------------|-------------|-------------------------------------------|
| Myh7        | myosin, heavy polypeptide 7, cardiac muscle, beta   | ventricular cardiac muscle tissue morphogenesis | marker of heart failure, re-expressed in response to cardiac stretch     | 0.00464255  | 4.55859     | mRNA<br>↗                                 |
| Nppb        | natriuretic peptide type B                          | regulation of blood pressure                    | positive regulator of pathological cardiac hypertrophy and heart failure | 0.0278867   | 1.63502     | mRNA<br>↗                                 |
| Bnip2 (Bax) | BCL2/adenovirus E1B interacting protein 2           | apoptosis                                       | Increase level of Bax mediates cardiac cell death                        | 0.0180247   | 1.66519     | protein<br>↗                              |
| Camkk2      | calcium/calmodulin-dependent protein kinase 2, beta | Signaling/protein phosphorylation               | Mediator myocardial hypertrophy and heart failure                        | 0.000992931 | 2.29466     | protein<br>↗                              |

|         |                                                |                                   |                                                                                                  |            |         |              |
|---------|------------------------------------------------|-----------------------------------|--------------------------------------------------------------------------------------------------|------------|---------|--------------|
| Camk4   | calcium/calmodulin-dependent protein kinase IV | Signaling/protein phosphorylation | ---                                                                                              | 0.0278867  | 1.63502 |              |
| Plcd3   | phospholipase C, delta 3                       | signaling/angiogenesis            | plays a role in blood pressure and hypertension                                                  | 0.0145045  | 1.52401 |              |
| Col3a1  | collagen, type III, alpha 1                    | skeletal system development       | Collagen deposition is associated with diastolic and systolic dysfunction of the left ventricles | 0.0495996  | 1.7752  | protein<br>↗ |
| Col8a1  | collagen, type VIII, alpha 1                   | angiogenesis                      | ---                                                                                              | 0.00187047 | 1.8856  |              |
| Col5a2  | collagen, type V, alpha 2                      | skeletal system development       | ---                                                                                              | 0.0349654  | 2.20268 |              |
| Col8a1  | collagen, type VIII, alpha 1                   | angiogenesis                      | ---                                                                                              | 0.00394766 | 2.54624 |              |
| Col12a1 | collagen, type XII, alpha 1                    | cell adhesion                     | ---                                                                                              | 0.0135607  | 2.59123 |              |
| Col8a2  | collagen, type VIII, alpha 2                   | angiogenesis                      | ---                                                                                              | 0.0279717  | 2.63823 |              |
| Col5a2  | collagen, type V, alpha 2                      | skeletal system development       | ---                                                                                              | 0.0329915  | 2.87415 |              |
| Col8a1  | collagen, type VIII, alpha 1                   | angiogenesis                      | ---                                                                                              | 0.00161066 | 3.33338 |              |
