# Supplementary material for: Deletion of low molecular weight protein tyrosine phosphatase (Acp1) protects against stress‐induced cardiomyopathy
Source: PubMed Central journal article supplement — J Pathol. 2015 Sep 1;237(4):482–94. doi: 10.1002/path.4594 (PMC5049627; doi:10.1002/path.4594), 2015-09-01
Supplement: PATH-237-482-s014.pdf [file PATH-237-482-s014.pdf]

**Supplementary Table S5:** Full microarray data showing the 828 genes significantly regulated (340 were down-regulated and 488 were up-regulated) in *Acp1<sup>+/+</sup>* after TAC vs. *Acp1<sup>+/+</sup>* after sham. Only genes expression with fold changes  $\geq 1.5$  (up-regulated) or  $\leq -1.5$  (down-regulated) and p-value  $< 0.05$  were considered statistically significant (*Acp1<sup>+/+</sup>* Sham, n=2; *Acp1<sup>+/+</sup>* TAC, n=5).

| RefSeq Transcript ID | Gene Symbol   | p-value<br>(+/+ tac vs. +/+ sham) | Fold-change (+/+ tac<br>vs. +/+ sham) |
|----------------------|---------------|-----------------------------------|---------------------------------------|
| NM_175087            | Aqp6          | 0.0132209                         | -10.0446                              |
| NM_053200            | Ces1d         | 0.0461934                         | -4.4883                               |
| NM_175087            | Aqp6          | 0.0415708                         | -3.90088                              |
| NM_053200            | Ces1d         | 0.046719                          | -3.80764                              |
| NM_008777            | Pah           | 0.00816665                        | -2.88519                              |
| NM_007892            | E2f5          | 0.0343685                         | -2.65961                              |
| NM_008426            | Kcnj3         | 0.00405282                        | -2.5446                               |
| ---                  | ---           | 0.0187616                         | -2.39603                              |
| NM_178936            | Tmem56        | 0.00265592                        | -2.39247                              |
| NM_009640            | Angpt1        | 0.00607298                        | -2.30553                              |
| NM_001122954         | Pla2g5        | 0.000163575                       | -2.27036                              |
| XM_001474896         | 6720475J19Rik | 0.0314827                         | -2.06759                              |

|              |               |            |          |
|--------------|---------------|------------|----------|
| NM_178936    | Tmem56        | 0.0310011  | -2.03144 |
| NM_178650    | Tbc1d10c      | 0.0258101  | -2.02799 |
| NM_001037907 | Ripply2       | 0.00541408 | -2.02164 |
| NM_020278    | Lgi1          | 0.0198443  | -2.01029 |
| NM_177162    | 9930032O22Rik | 0.00497469 | -2.00849 |
| NM_001190718 | Dcaf12l1      | 0.00316721 | -2.00333 |
| NM_029555    | Gstk1         | 0.0074347  | -1.99874 |
| XM_907235    | A930018M24Rik | 0.0202938  | -1.98575 |
| NM_177470    | Acaa2         | 0.036179   | -1.97859 |
| NM_007911    | Efnb3         | 0.0448149  | -1.97003 |
| NM_009879    | lft81         | 0.0335024  | -1.96796 |
| NM_181815    | 4930534B04Rik | 0.00667698 | -1.94957 |
| NM_026384    | Dgat2         | 0.019203   | -1.93902 |
| NM_001114662 | Mfsd4         | 0.00212804 | -1.9359  |
| NM_133808    | Hdlbp         | 0.0400708  | -1.93223 |
| NM_133979    | Ano10         | 0.0213222  | -1.9243  |
| NM_019697    | Kcnd2         | 0.008382   | -1.91448 |
| NM_001159900 | Hopx          | 0.0329242  | -1.91446 |

|              |               |            |          |
|--------------|---------------|------------|----------|
| NM_028491    | 1700040L02Rik | 0.0330116  | -1.90932 |
| NM_175191    | Gpr22         | 0.0415211  | -1.90702 |
| NM_026384    | Dgat2         | 0.0132061  | -1.89605 |
| NM_001168296 | Ephb1         | 0.00304564 | -1.88779 |
| NM_009879    | Ift81         | 0.0261982  | -1.88687 |
| NM_153170    | Slc36a2       | 0.0124057  | -1.88324 |
| NM_026172    | Decr1         | 0.0246502  | -1.88239 |
| NM_027126    | Hfe2          | 0.00349671 | -1.88027 |
| NM_001099738 | Dnajc28       | 0.00386059 | -1.87479 |
| NM_001168318 | Scara5        | 0.0314181  | -1.87329 |
| ---          | ---           | 0.00661841 | -1.85602 |
| NM_001044720 | Abcc9         | 0.00106986 | -1.84611 |
| NM_009685    | Apbb1         | 0.00780945 | -1.83339 |
| NM_001017427 | Rasef         | 7.35E-05   | -1.83079 |
| NM_019826    | Ivd           | 0.0361484  | -1.83046 |
| NM_011991    | Cops3         | 0.0112405  | -1.83015 |
| NM_029361    | Wnk2          | 0.00678989 | -1.82849 |
| NM_025599    | 2610528E23Rik | 0.0130124  | -1.82742 |

|              |               |             |          |
|--------------|---------------|-------------|----------|
| NM_021477    | Rbfox1        | 0.00127085  | -1.82695 |
| NM_145448    | 9030617O03Rik | 0.0051155   | -1.81727 |
| NM_010578    | Itgb1         | 0.00158814  | -1.81641 |
| NM_011797    | Car14         | 0.0227177   | -1.81068 |
| NM_183179    | Kcnc2         | 0.0104799   | -1.80855 |
| NM_020257    | Clec2i        | 0.014099    | -1.79812 |
| NM_001145977 | Cadm2         | 0.016986    | -1.78955 |
| ---          | ---           | 0.0331887   | -1.7886  |
| XR_105353    | E130307A14Rik | 0.02574     | -1.78272 |
| NM_009949    | Cpt2          | 0.0356991   | -1.78249 |
| NM_134420    | Slc26a6       | 0.00990679  | -1.7803  |
| NM_016772    | Ech1          | 0.0186158   | -1.77865 |
| NM_012006    | Acot1         | 0.049486    | -1.7751  |
| NM_172778    | Maob          | 0.0169945   | -1.77492 |
| NM_177200    | Svopl         | 0.0177914   | -1.77081 |
| NM_175523    | Ppm1k         | 0.00134307  | -1.76814 |
| NM_021477    | Rbfox1        | 0.0404338   | -1.76421 |
| NM_011158    | Prkar2b       | 0.000655647 | -1.76178 |

|              |               |             |          |
|--------------|---------------|-------------|----------|
| NM_001085515 | Al464131      | 0.0176002   | -1.76007 |
| NM_010023    | Dci           | 0.0273605   | -1.75563 |
| NM_011856    | Odz2          | 0.00192729  | -1.75023 |
| NM_175535    | Arhgap20      | 0.0146919   | -1.74992 |
| XM_003084661 | Gm6590        | 0.0210975   | -1.74927 |
| NM_001085501 | Ppp1r3d       | 0.0152292   | -1.74458 |
| NM_133931    | Pot1a         | 0.00660935  | -1.74209 |
| NR_033502    | C030023E24Rik | 0.0013127   | -1.73945 |
| ---          | C78859        | 0.00871607  | -1.73151 |
| NM_008888    | Phox2b        | 0.0204357   | -1.73143 |
| NM_019697    | Kcnd2         | 0.0108835   | -1.72887 |
| NM_009685    | Apbb1         | 0.0104699   | -1.72774 |
| NM_001044744 | Gcdh          | 0.0029375   | -1.72437 |
| NM_001143956 | Mettl11b      | 0.0133042   | -1.72073 |
| NM_026808    | Fitm1         | 0.00767419  | -1.71967 |
| NM_181815    | 4930534B04Rik | 0.00779557  | -1.71671 |
| NM_029953    | Arhgef38      | 0.000172493 | -1.71379 |
| NM_010473    | Hrc           | 0.00103118  | -1.70948 |

|              |               |             |          |
|--------------|---------------|-------------|----------|
| NM_009640    | Angpt1        | 0.0143182   | -1.7072  |
| ---          | ---           | 0.0129288   | -1.70706 |
| NR_015539    | 9630013A20Rik | 0.00703562  | -1.70309 |
| NM_009700    | Aqp4          | 0.0264242   | -1.70291 |
| NM_010419    | Hes5          | 0.00783407  | -1.70199 |
| NM_001170748 | Asb14         | 0.0184552   | -1.70177 |
| NM_001163945 | Rpl3l         | 0.0104409   | -1.69999 |
| NM_175523    | Ppm1k         | 0.0119108   | -1.69845 |
| NM_001025364 | Rtn2          | 0.0385917   | -1.69673 |
| XR_105042    | Gm6600        | 0.0176757   | -1.68971 |
| NM_023784    | Yipf7         | 0.0274648   | -1.68782 |
| ---          | ---           | 0.000278832 | -1.68671 |
| ---          | ---           | 0.000549399 | -1.6867  |
| ---          | 6030442H21Rik | 0.0218054   | -1.68646 |
| XR_035454    | BC034902      | 0.043254    | -1.68603 |
| NM_022982    | Rtn4r         | 0.00601005  | -1.68577 |
| NM_028493    | Rhobtb3       | 0.000511933 | -1.68474 |
| NM_001031772 | Lin28b        | 0.0220845   | -1.68448 |

|              |               |             |          |
|--------------|---------------|-------------|----------|
| NM_001190322 | Chchd7        | 0.00518587  | -1.68078 |
| NM_001085546 | 2210418O10Rik | 0.0114097   | -1.68042 |
| ---          | D030020J04Rik | 0.00910479  | -1.67908 |
| ---          | A930025H08Rik | 0.00415563  | -1.67878 |
| NM_001102430 | Arfgef1       | 0.0213993   | -1.6752  |
| NM_001114339 | Pank1         | 0.015357    | -1.67482 |
| NM_007426    | Angpt2        | 0.00014092  | -1.67075 |
| NM_001013390 | Scn4b         | 0.00176727  | -1.66878 |
| NM_001003824 | Kcnq2         | 0.00462823  | -1.66683 |
| NM_011044    | Pck1          | 0.00277833  | -1.66615 |
| NM_144903    | Aldob         | 0.0442455   | -1.66501 |
| NM_001033597 | Acsl6         | 0.0204201   | -1.66477 |
| NM_007697    | Chl1          | 0.00571708  | -1.66468 |
| NM_010170    | F2rl2         | 0.000552187 | -1.66448 |
| NR_015456    | D7Ert715e     | 0.0275005   | -1.66158 |
| NM_080455    | Tshz2         | 0.0033434   | -1.6594  |
| NM_001044720 | Abcc9         | 0.0380038   | -1.65684 |
| ---          | ---           | 0.0047252   | -1.65589 |

|              |               |             |          |
|--------------|---------------|-------------|----------|
| NM_001040669 | Gm10058       | 0.00151749  | -1.65521 |
| NM_134071    | Ankrd32       | 0.00509223  | -1.65273 |
| NM_153794    | 4933403F05Rik | 0.00538826  | -1.65137 |
| ---          | 9430087N24Rik | 0.00747281  | -1.65053 |
| NM_027321    | Lrrc39        | 0.0138245   | -1.64852 |
| NM_175236    | Adhfe1        | 0.0266349   | -1.64753 |
| NM_019472    | Myo10         | 0.00761075  | -1.64727 |
| NM_029095    | Hhatl         | 0.000815641 | -1.64454 |
| NM_053014    | Agpat3        | 0.0390051   | -1.64365 |
| NM_001159354 | Magi3         | 0.0387942   | -1.64155 |
| NM_153459    | Dusp7         | 0.00867958  | -1.63939 |
| NM_008966    | Ptgfr         | 0.00197025  | -1.63784 |
| NM_020520    | Slc25a20      | 0.00575425  | -1.63536 |
| XM_003085444 | 2310040G07Rik | 0.00216299  | -1.63415 |
| NM_018852    | Scn9a         | 0.00883072  | -1.63327 |
| NR_015572    | 1810014B01Rik | 0.0206912   | -1.63211 |
| ---          | ---           | 0.0316047   | -1.63172 |
| ---          | ---           | 0.0105564   | -1.63027 |



|              |          |            |          |
|--------------|----------|------------|----------|
| NM_029619    | Msrb2    | 0.0272476  | -1.62848 |
| NM_001161420 | Vldlr    | 0.00662815 | -1.62837 |
| NM_001164370 | Mipol1   | 0.0102567  | -1.62756 |
| NM_008017    | Smc2     | 0.00342258 | -1.627   |
| NM_173763    | Ccbl2    | 0.0112158  | -1.62587 |
| NM_001025576 | Ccdc141  | 0.0239129  | -1.62417 |
| NM_175236    | Adhfe1   | 0.0347019  | -1.62405 |
| NM_026793    | Myct1    | 0.0242894  | -1.62313 |
| NM_008650    | Mut      | 0.00886543 | -1.62176 |
| NM_010022    | Dbt      | 0.0138663  | -1.62036 |
| NM_178869    | Ttll1    | 0.0331203  | -1.61962 |
| NM_145523    | Gca      | 0.0073908  | -1.61921 |
| ---          | ---      | 0.0203448  | -1.61879 |
| NM_001161420 | Vldlr    | 0.00159151 | -1.61855 |
| NM_007823    | Cyp4b1   | 0.0226639  | -1.61769 |
| NM_028091    | Osgepl1  | 0.0183328  | -1.61739 |
| NM_001081231 | Lhfp13   | 0.00139517 | -1.61591 |
| ---          | AI616248 | 0.00233485 | -1.61546 |

|              |               |             |          |
|--------------|---------------|-------------|----------|
| ---          | ---           | 0.00570978  | -1.61458 |
| NM_001101510 | Susd5         | 0.000467423 | -1.61341 |
| NM_173753    | Fnip1         | 0.00741198  | -1.61306 |
| NM_011317    | Khdrbs1       | 0.0145732   | -1.61157 |
| NM_183283    | 2310010M20Rik | 0.018145    | -1.60919 |
| NM_178405    | Atp1a2        | 0.0309127   | -1.60837 |
| NM_153543    | Aldh1l2       | 0.0300327   | -1.60802 |
| NM_010610    | Kcnma1        | 0.0110528   | -1.60765 |
| NM_052994    | Spock2        | 0.00755061  | -1.60762 |
| ---          | ---           | 0.0431143   | -1.6071  |
| XM_001476568 | LOC100046658  | 0.0137429   | -1.60654 |
| NM_001029836 | Npnt          | 0.00837872  | -1.60385 |
| NM_080575    | Acss1         | 0.00879357  | -1.60341 |
| NM_134188    | Acot2         | 0.0251287   | -1.60106 |
| NM_001081180 | Spink5        | 0.000163736 | -1.59914 |
| NM_001098170 | Pcdh10        | 0.00507293  | -1.59867 |
| NM_145624    | Zfp709        | 0.00569287  | -1.59819 |
| XR_104992    | 2310040G24Rik | 0.0447644   | -1.59721 |

|              |               |             |          |
|--------------|---------------|-------------|----------|
| NM_181073    | Plekhh1       | 0.0067263   | -1.59693 |
| NM_001164683 | Tmem29        | 0.0147674   | -1.59652 |
| XR_105594    | AW495222      | 0.00373714  | -1.59484 |
| NM_001161431 | Slitrk2       | 0.0216791   | -1.59134 |
| NM_001025576 | Ccdc141       | 0.0169109   | -1.59084 |
| ---          | ---           | 0.0241381   | -1.59009 |
| NM_030026    | Mccc2         | 0.0281394   | -1.58891 |
| NM_001040396 | 2810407C02Rik | 0.00927608  | -1.58789 |
| NM_019427    | Epb4.1l4b     | 0.00542239  | -1.58765 |
| NM_178758    | Acsm5         | 0.0212437   | -1.58745 |
| NM_007936    | Epha4         | 0.028337    | -1.58669 |
| NM_199143    | Znrf2         | 0.0337473   | -1.58649 |
| ---          | 5730526G10Rik | 0.00639866  | -1.58476 |
| ---          | ---           | 0.0317541   | -1.58372 |
| NM_001083967 | Tcf4          | 0.000387851 | -1.58323 |
| NM_173866    | Gpt2          | 0.0276433   | -1.58307 |
| NM_001110202 | Trim9         | 0.00669447  | -1.58091 |
| NM_026470    | Spata6        | 0.0162237   | -1.58042 |

|              |               |             |          |
|--------------|---------------|-------------|----------|
| NM_008552    | Mas1          | 0.0179859   | -1.58031 |
| NM_001168382 | Phf14         | 0.03999     | -1.58031 |
| NM_008609    | Mmp15         | 0.0188867   | -1.5801  |
| NM_007419    | Adrb1         | 0.0210033   | -1.57925 |
| ---          | 2900005I04Rik | 0.00999753  | -1.578   |
| NM_008864    | Prl3d1        | 8.36E-05    | -1.57663 |
| XR_035179    | A530021J07Rik | 0.0377212   | -1.57639 |
| ---          | 6820445E23Rik | 0.0130352   | -1.57608 |
| NM_029321    | Ttc32         | 0.0239021   | -1.57588 |
| NM_011215    | Ptprn2        | 0.005761    | -1.57423 |
| NM_011395    | Slc22a3       | 0.0471791   | -1.57361 |
| NM_001081567 | Mapk10        | 0.00767911  | -1.57223 |
| NM_001037726 | Creb1         | 0.00576309  | -1.5722  |
| ---          | ---           | 0.0157515   | -1.57212 |
| NM_007655    | Cd79a         | 0.0168569   | -1.57144 |
| NM_001037987 | Edil3         | 0.00242528  | -1.57088 |
| ---          | ---           | 0.000899298 | -1.57002 |
| NM_133648    | Slc12a6       | 0.0103649   | -1.56951 |

|              |               |             |          |
|--------------|---------------|-------------|----------|
| ---          | ---           | 0.0235763   | -1.56949 |
| NM_175535    | Arhgap20      | 0.00362039  | -1.56934 |
| NM_008482    | Lamb1         | 0.0136058   | -1.56816 |
| NM_001026214 | Entpd5        | 0.0395036   | -1.5674  |
| NM_001164804 | Coro2a        | 0.010244    | -1.56714 |
| ---          | ---           | 0.00398791  | -1.56582 |
| NM_001040395 | 1110020G09Rik | 0.00998591  | -1.56511 |
| NM_008651    | Mybl1         | 0.0263017   | -1.56464 |
| ---          | ---           | 0.00436333  | -1.56453 |
| ---          | ---           | 0.0322566   | -1.56424 |
| NR_015572    | 1810014B01Rik | 0.00751895  | -1.56377 |
| NM_001128198 | Vps13d        | 0.000393188 | -1.56255 |
| ---          | ---           | 0.00439508  | -1.56222 |
| NM_080444    | Asb10         | 0.00587237  | -1.56188 |
| NM_008216    | Has2          | 0.00381463  | -1.56133 |
| NM_178630    | Agbl3         | 0.0208359   | -1.56004 |
| NM_183046    | Kif20b        | 0.0140899   | -1.55982 |
| NM_019697    | Kcnd2         | 0.0381604   | -1.55977 |

|              |               |            |          |
|--------------|---------------|------------|----------|
| ---          | 4933411O13Rik | 0.0439868  | -1.5594  |
| NM_001109684 | 9030409G11Rik | 0.0240375  | -1.55797 |
| NM_009936    | Col9a3        | 0.0230863  | -1.55661 |
| ---          | ---           | 0.00349052 | -1.55486 |
| NM_030026    | Mccc2         | 0.00776135 | -1.5544  |
| NR_024619    | 2610001J05Rik | 0.00516415 | -1.55416 |
| NM_001044697 | Zfp2          | 0.00274693 | -1.55402 |
| ---          | 5430414B19Rik | 0.00232165 | -1.55353 |
| ---          | ---           | 0.008407   | -1.55344 |
| NM_181588    | Cmbl          | 0.0206934  | -1.55242 |
| NM_009250    | Serpini1      | 0.0256265  | -1.55163 |
| NM_007883    | Dsg2          | 0.029079   | -1.55159 |
| NM_001168508 | Mapk14        | 0.019059   | -1.55096 |
| NM_028039    | Esco2         | 0.0160523  | -1.54991 |
| NM_001166009 | Tmem215       | 0.0102055  | -1.54986 |
| NM_008066    | Gabra2        | 0.00558979 | -1.54856 |
| NM_029863    | 9230110F15Rik | 0.0219029  | -1.54842 |
| NM_010314    | Gngt1         | 0.00139455 | -1.54772 |

|              |               |             |          |
|--------------|---------------|-------------|----------|
| NM_016889    | Insm1         | 0.0192066   | -1.54748 |
| NM_018829    | Ap3m1         | 0.0197094   | -1.54705 |
| NM_001166371 | Zfml          | 0.0291875   | -1.54626 |
| NM_025978    | Ttc14         | 0.0117491   | -1.54609 |
| ---          | ---           | 0.00074663  | -1.54548 |
| NM_001081499 | Tbc1d8b       | 0.0491039   | -1.54527 |
| NM_001083916 | 1810019J16Rik | 0.0194314   | -1.54516 |
| NM_027275    | Ptcd3         | 0.0123063   | -1.54239 |
| NM_028091    | Osgepl1       | 0.0184368   | -1.54225 |
| ---          | 9130413E14Rik | 0.0130438   | -1.54164 |
| NM_001170489 | Aplf          | 0.00446696  | -1.54086 |
| NM_027402    | Fndc5         | 0.00241466  | -1.54079 |
| NM_018768    | Stx8          | 0.00323683  | -1.54012 |
| NM_011308    | Ncor1         | 0.0313538   | -1.53978 |
| NM_173397    | Fitm2         | 0.0100412   | -1.53821 |
| NM_028443    | Fam101a       | 0.000576016 | -1.53755 |
| NM_025794    | Etfdh         | 0.0350169   | -1.5374  |
| NR_003964    | Tubb2a-ps2    | 0.0458407   | -1.53718 |

|              |               |             |          |
|--------------|---------------|-------------|----------|
| ---          | ---           | 0.00205296  | -1.53711 |
| NM_007936    | Epha4         | 0.0266194   | -1.5349  |
| NM_080285    | Cttnbp2       | 0.0239195   | -1.53433 |
| NM_021524    | Nampt         | 0.0345332   | -1.53428 |
| NM_007590    | Calm3         | 0.00115288  | -1.53321 |
| NM_001037099 | Cacnb4        | 0.00885337  | -1.53238 |
| ---          | AA511254      | 0.000598933 | -1.53189 |
| NM_019577    | Ccl24         | 0.0367012   | -1.53183 |
| NM_021790    | Cenpk         | 0.000871249 | -1.53082 |
| NM_001110129 | Ppnh          | 0.0127224   | -1.52864 |
| NM_001126489 | Zfp735        | 0.000823974 | -1.52836 |
| NM_001033235 | Trim40        | 0.0319107   | -1.52789 |
| NM_001039185 | Ceacam1       | 0.0417821   | -1.52789 |
| ---          | ---           | 0.0242841   | -1.52772 |
| NM_013513    | Epb4.2        | 0.00643082  | -1.52695 |
| ---          | A930008B05Rik | 0.00835917  | -1.52657 |
| NM_199195    | Bckdhh        | 0.0284839   | -1.52637 |
| NM_178386    | Slc25a31      | 0.043111    | -1.52567 |



|              |               |             |          |
|--------------|---------------|-------------|----------|
| NM_011158    | Prkar2b       | 0.00177331  | -1.52536 |
| NM_025695    | Smc6          | 0.0153264   | -1.52498 |
| NM_001017407 | Tbata         | 0.00542315  | -1.52466 |
| NM_133435    | Nmnat1        | 0.02266     | -1.5224  |
| ---          | D3Erttd797e   | 0.0344576   | -1.52215 |
| NM_145463    | Shisa2        | 0.00130921  | -1.52204 |
| NM_027126    | Hfe2          | 0.0362081   | -1.52171 |
| NM_018800    | Syt6          | 0.0136088   | -1.52156 |
| NM_008779    | Cntn3         | 0.00975882  | -1.5215  |
| ---          | B930036G03Rik | 0.0125383   | -1.5212  |
| ---          | D6Erttd160e   | 0.00382587  | -1.52079 |
| NM_178727    | D630039A03Rik | 0.00329029  | -1.5205  |
| NM_007423    | Afp           | 0.00144461  | -1.52026 |
| ---          | 5830415B17Rik | 0.000727147 | -1.52004 |
| NM_001163587 | Agxt2l1       | 0.0099551   | -1.51858 |
| NM_172946    | Krt222        | 0.00560824  | -1.51844 |
| ---          | 2900022M07Rik | 0.00900916  | -1.51801 |
| XR_104742    | 2500004C02Rik | 0.0307325   | -1.5177  |

|              |               |             |          |
|--------------|---------------|-------------|----------|
| NM_001110202 | Trim9         | 0.00675215  | -1.51672 |
| NM_009524    | Wnt5a         | 0.0143013   | -1.51593 |
| NM_146241    | Trhde         | 0.0071939   | -1.51574 |
| NM_009065    | Rit2          | 0.017257    | -1.5157  |
| NM_009020    | Rag2          | 0.0260446   | -1.51516 |
| NM_026104    | Tmco5         | 0.0139683   | -1.51477 |
| NM_001013780 | Slc25a34      | 0.00309569  | -1.51442 |
| NM_008212    | Hadh          | 0.0156688   | -1.51425 |
| NM_029250    | Etnk1         | 0.000475939 | -1.51369 |
| ---          | ---           | 0.0432628   | -1.51277 |
| NM_001161362 | Ppp2r3a       | 0.0259668   | -1.51264 |
| NM_023910    | Tsc22d4       | 0.000636606 | -1.51087 |
| XM_001473772 | 2010109A12Rik | 0.0197169   | -1.51071 |
| NM_148927    | Plekha4       | 0.00922792  | -1.51006 |
| NM_001167946 | 1700008F21Rik | 0.0223701   | -1.50997 |
| NM_205810    | Mrgprb1       | 0.00881505  | -1.50988 |
| ---          | ---           | 0.00269282  | -1.50831 |
| NM_001190718 | Dcaf12l1      | 0.0388647   | -1.50758 |

|              |               |            |          |
|--------------|---------------|------------|----------|
| NM_001171615 | Myt1          | 0.00167153 | -1.50753 |
| NM_178731    | Lrrtm4        | 0.00695031 | -1.50731 |
| NM_053226    | Vmn1r53       | 0.00216343 | -1.50703 |
| NM_172740    | Zfp420        | 0.0318076  | -1.50671 |
| NM_001161420 | Vldlr         | 0.00629403 | -1.50653 |
| ---          | ---           | 0.00856852 | -1.50637 |
| NM_172853    | Cdh7          | 0.0131701  | -1.50633 |
| NM_130876    | Krtap16-9     | 0.0127221  | -1.50511 |
| NM_030688    | Il1rapl2      | 0.0181952  | -1.50418 |
| NM_146247    | BC024814      | 0.0492303  | -1.50413 |
| NM_009257    | Serpinb5      | 0.0335892  | -1.50406 |
| NM_053198    | Sfxn4         | 0.00775545 | -1.50387 |
| NM_001177795 | Rgs20         | 0.0344459  | -1.50384 |
| ---          | ---           | 0.0177844  | -1.50343 |
| ---          | 4930509E22Rik | 0.00641748 | -1.50341 |
| NM_029436    | Klhl24        | 0.0147687  | -1.5028  |
| NM_001004066 | Zfp386        | 0.00644776 | -1.50225 |
| NM_001113327 | Fam131b       | 0.00985745 | -1.50208 |

|              |             |            |          |
|--------------|-------------|------------|----------|
| NM_001134383 | Iqsec1      | 0.0378583  | -1.50132 |
| NM_021317    | Dnajb7      | 0.00778513 | -1.50122 |
| NM_001101479 | Pabpc4l     | 0.0314269  | -1.50092 |
| NM_001025576 | Ccdc141     | 0.00435452 | -1.50013 |
| ---          | ---         | 0.00539471 | 1.50042  |
| NM_001033380 | Itpripl2    | 0.0215528  | 1.50247  |
| NM_001077595 | Shroom3     | 0.0289948  | 1.50258  |
| NM_018869    | Grk5        | 0.0279833  | 1.5031   |
| NM_144515    | Zfp52       | 0.0292021  | 1.50347  |
| ---          | ---         | 0.028743   | 1.50368  |
| ---          | D7Erttd183e | 0.00862099 | 1.50437  |
| ---          | ---         | 0.00556641 | 1.50494  |
| NM_001043355 | Mtap6       | 0.00215626 | 1.50682  |
| NM_013819    | H2-M3       | 0.0411842  | 1.50783  |
| NM_011373    | St6galnac4  | 0.0286882  | 1.50791  |
| NM_001048208 | Med14       | 0.00723232 | 1.50833  |
| NM_010169    | F2r         | 0.0204259  | 1.50853  |
| NM_009890    | Ch25h       | 0.0334659  | 1.50885  |

|              |               |            |         |
|--------------|---------------|------------|---------|
| NM_133242    | Rbm39         | 0.00767775 | 1.5102  |
| NM_008555    | Masp1         | 0.00501676 | 1.51074 |
| NM_023831    | lft46         | 3.52E-05   | 1.51145 |
| NM_007404    | Adam9         | 0.0197577  | 1.51405 |
| NM_053183    | Ddx50         | 0.00150902 | 1.51458 |
| NM_001083912 | Plekhg2       | 0.0467212  | 1.51463 |
| NM_139001    | Cspg4         | 0.0386225  | 1.51622 |
| NM_008437    | Napsa         | 0.00118535 | 1.51792 |
| NM_144830    | Tmem106a      | 0.0477206  | 1.51815 |
| NM_023734    | Pi16          | 0.0164707  | 1.51851 |
| NM_028243    | Prcp          | 0.0402982  | 1.51985 |
| NM_027656    | Zbtb46        | 0.00101037 | 1.51995 |
| NM_008774    | Pabpc1        | 0.0343075  | 1.52015 |
| NM_001013012 | Zfp787        | 0.0223169  | 1.52075 |
| NM_001110850 | Crem          | 0.0307557  | 1.52077 |
| NR_015516    | 4930526115Rik | 0.0239119  | 1.521   |
| NM_019666    | Syncrip       | 0.00858622 | 1.52111 |
| NR_015505    | 6720401G13Rik | 0.0297864  | 1.52123 |

|              |         |            |         |
|--------------|---------|------------|---------|
| ---          | ---     | 0.0350483  | 1.52161 |
| NM_011519    | Sdc1    | 0.0411423  | 1.52178 |
| NM_016703    | Preb    | 0.033104   | 1.52274 |
| NM_009302    | Swap70  | 0.0149242  | 1.52289 |
| ---          | ---     | 0.02794    | 1.52293 |
| NM_001081028 | Sipa1l3 | 0.00698684 | 1.52338 |
| NM_152813    | Plcd3   | 0.0145045  | 1.52401 |
| ---          | ---     | 0.00963509 | 1.52407 |
| NM_021288    | Tyms    | 0.00413204 | 1.52414 |
| NM_001111324 | Nedd9   | 0.00260472 | 1.52648 |
| NM_007832    | Dck     | 0.00680933 | 1.52718 |
| ---          | ---     | 0.00108593 | 1.52749 |
| NM_148929    | Slc9a8  | 0.0138194  | 1.52777 |
| NM_001081557 | Camta1  | 0.00714248 | 1.52779 |
| NM_011790    | Arih2   | 0.021591   | 1.52928 |
| NM_009612    | Acvr1l  | 0.0158818  | 1.5301  |
| ---          | ---     | 0.00182853 | 1.53029 |
| NM_022656    | Nisch   | 0.00677719 | 1.53037 |

|              |               |            |         |
|--------------|---------------|------------|---------|
| NM_152809    | Csnk1g3       | 0.015459   | 1.53038 |
| NM_027209    | Ms4a6b        | 0.0352847  | 1.5307  |
| NM_207221    | Jmjd1c        | 0.0432534  | 1.53083 |
| ---          | 4930573O21Rik | 0.0158394  | 1.53095 |
| NM_172994    | Ppp2r2c       | 0.0307518  | 1.53142 |
| NM_028469    | 3110082117Rik | 0.0117176  | 1.53156 |
| NM_008397    | Itga6         | 0.0206098  | 1.53302 |
| NM_001164792 | Tpbg          | 0.0210605  | 1.53327 |
| XR_105767    | LOC100504504  | 0.0358198  | 1.53341 |
| NM_001081652 | Nacad         | 0.0351209  | 1.5335  |
| NM_001025261 | Tpd52         | 0.0172425  | 1.53379 |
| NM_009373    | Tgm2          | 0.0282877  | 1.53415 |
| NM_145377    | Trim41        | 0.00889321 | 1.5343  |
| NM_028841    | Serpina1a     | 0.0174257  | 1.53443 |
| NM_009243    | Tspan17       | 0.03374    | 1.53443 |
| NM_207215    | Mycbp2        | 0.0190489  | 1.5348  |
| NM_010431    | Hif1a         | 0.00925954 | 1.53501 |
| NM_026667    | Fam114a1      | 0.0340642  | 1.53564 |

|              |               |             |         |
|--------------|---------------|-------------|---------|
| NM_001159864 | Kctd18        | 0.00562642  | 1.53578 |
| ---          | ---           | 0.00755826  | 1.53693 |
| NM_001163766 | Wdr90         | 0.00754348  | 1.53778 |
| NM_170756    | Spata2        | 0.00944239  | 1.53785 |
| NM_001168225 | Morf4l2       | 0.00426073  | 1.53798 |
| ---          | ---           | 0.000346505 | 1.5396  |
| NM_133905    | Papd4         | 0.0473176   | 1.53964 |
| NM_009224    | Snrnp70       | 0.026455    | 1.53986 |
| NM_021495    | Pvr13         | 0.0187038   | 1.53994 |
| NM_001195390 | Commd7        | 0.0230196   | 1.54016 |
| NM_173437    | Nav1          | 0.0267512   | 1.54099 |
| NR_015585    | 4933439C10Rik | 0.000947397 | 1.54237 |
| NM_029891    | Nkrf          | 0.000696082 | 1.54283 |
| NM_026268    | Dusp6         | 0.0308547   | 1.54445 |
| ---          | ---           | 0.00932005  | 1.54618 |
| NM_130889    | Anp32b        | 0.00463863  | 1.54694 |
| NM_145392    | Bag2          | 0.00709097  | 1.5471  |
| NM_001159905 | Zfand2b       | 0.0481157   | 1.54735 |



|              |               |             |         |
|--------------|---------------|-------------|---------|
| ---          | ---           | 0.0317538   | 1.54766 |
| NM_008555    | Masp1         | 0.0115903   | 1.54781 |
| NM_018828    | Fnbp4         | 0.000306204 | 1.54813 |
| NM_022416    | Stk32b        | 0.0192567   | 1.54822 |
| NM_009373    | Tgm2          | 0.0252661   | 1.54832 |
| NM_001083937 | Slc35a2       | 0.00259002  | 1.54903 |
| NM_001025312 | Dclre1b       | 0.0208439   | 1.55038 |
| NM_013562    | lfrd1         | 0.0199825   | 1.55066 |
| ---          | 2610319H10Rik | 0.0154421   | 1.55136 |
| NM_027182    | Trip13        | 0.0252783   | 1.55173 |
| NM_029023    | Scpep1        | 0.0247289   | 1.55257 |
| NM_026473    | Tubb6         | 0.0178969   | 1.55272 |
| NM_024226    | Rtn4          | 0.00267068  | 1.55292 |
| NM_016912    | Cdkl2         | 0.00450528  | 1.55306 |
| NM_030260    | Zxdc          | 0.00331992  | 1.55317 |
| NM_009712    | Arsb          | 0.0274891   | 1.55335 |
| ---          | 9930031P18Rik | 0.0405444   | 1.55355 |
| ---          | ---           | 0.0018501   | 1.55433 |

|              |               |             |         |
|--------------|---------------|-------------|---------|
| NM_028870    | Cltb          | 0.0141239   | 1.55568 |
| NM_010798    | Mif           | 0.0118037   | 1.55591 |
| NM_001039386 | Nelf          | 0.0202843   | 1.55742 |
| NM_009448    | Gm5620        | 1.41E-05    | 1.5576  |
| ---          | ---           | 0.0449345   | 1.55809 |
| NM_007840    | Ddx5          | 0.000693783 | 1.55963 |
| NM_007930    | Enc1          | 0.0295819   | 1.56067 |
| NM_027154    | Tmbim1        | 0.0389668   | 1.56071 |
| NM_172730    | C130022K22Rik | 0.00158942  | 1.56131 |
| NM_026484    | Ccny          | 0.0361469   | 1.56138 |
| NM_133697    | 1110003E01Rik | 0.00553924  | 1.56212 |
| NM_008259    | Foxa1         | 0.00993566  | 1.56261 |
| NM_031367    | H28           | 0.0056145   | 1.56306 |
| NM_173870    | Mgat4a        | 0.0253802   | 1.56524 |
| ---          | 6330417A16Rik | 0.0397341   | 1.5654  |
| NM_011274    | C80913        | 0.0154886   | 1.56679 |
| NM_020267    | Trim44        | 0.0152174   | 1.56761 |
| NM_001136071 | Lsp1          | 0.0191426   | 1.56829 |

|              |               |             |         |
|--------------|---------------|-------------|---------|
| NM_001162906 | 2410089E03Rik | 0.00250641  | 1.56932 |
| NM_010500    | Ier5          | 0.0387313   | 1.56963 |
| NM_001164677 | Pdcd6ip       | 0.0208915   | 1.57005 |
| NM_018773    | Skap2         | 0.0281131   | 1.57077 |
| NM_017395    | Rfx5          | 0.00785075  | 1.57148 |
| NM_016798    | Pdlim3        | 0.0158508   | 1.57209 |
| NM_001045529 | Morc3         | 0.0173101   | 1.57242 |
| NM_019914    | Mllt11        | 0.00623678  | 1.57382 |
| NM_024194    | Lrrc40        | 0.0180449   | 1.57387 |
| NM_001081163 | Chsy1         | 0.0225536   | 1.5743  |
| NR_003633    | Meg3          | 0.0455997   | 1.57702 |
| ---          | ---           | 0.0135943   | 1.57915 |
| NM_010065    | Dnm1          | 0.0315757   | 1.57927 |
| NM_177030    | Dock6         | 0.00153243  | 1.57963 |
| ---          | 9930017N22Rik | 0.016946    | 1.5799  |
| NM_029508    | Pcgf5         | 0.00282535  | 1.58009 |
| ---          | B430203I24Rik | 0.000573065 | 1.58073 |
| NM_175132    | Synpo2l       | 0.0250038   | 1.58198 |

|              |               |            |         |
|--------------|---------------|------------|---------|
| NM_153775    | Ctu2          | 0.00063658 | 1.58449 |
| NM_011055    | Pde3b         | 0.0357529  | 1.58576 |
| NM_009808    | Casp12        | 0.0233162  | 1.58592 |
| ---          | ---           | 0.0283718  | 1.58713 |
| NM_018884    | Pdzrn3        | 0.00698037 | 1.58717 |
| ---          | ---           | 0.00953881 | 1.58731 |
| NM_201354    | Gm672         | 0.0486234  | 1.5883  |
| NM_001081027 | Kcnt2         | 0.046292   | 1.58835 |
| NM_021880    | Prkar1a       | 0.0127892  | 1.58965 |
| NM_029770    | Unc5b         | 0.00586174 | 1.58998 |
| NM_176952    | 6430573F11Rik | 0.0113027  | 1.5907  |
| NM_009829    | Ccnd2         | 0.00887161 | 1.59092 |
| NM_001145884 | Itgb5         | 0.0272947  | 1.59208 |
| NM_001111324 | Nedd9         | 0.0462038  | 1.59226 |
| NM_001177646 | Sirpa         | 0.0326031  | 1.59237 |
| NM_001037723 | Adcy7         | 0.0423236  | 1.59356 |
| NM_011518    | Sykb          | 0.0351649  | 1.59468 |
| ---          | AU021025      | 0.0129661  | 1.59627 |

|              |               |            |         |
|--------------|---------------|------------|---------|
| ---          | ---           | 0.00868851 | 1.5968  |
| NM_133791    | Wwc2          | 0.00987765 | 1.59708 |
| NM_008624    | Mras          | 0.00634329 | 1.59759 |
| ---          | ---           | 0.0149748  | 1.5976  |
| NM_001081557 | Camta1        | 0.00887269 | 1.59769 |
| NM_026655    | 2310057M21Rik | 0.0171641  | 1.59877 |
| NM_001113326 | Msr1          | 0.0360885  | 1.59877 |
| NM_001081367 | Kctd17        | 0.0310419  | 1.59996 |
| ---          | ---           | 0.0102229  | 1.60123 |
| NM_015783    | Gm9706        | 0.0213636  | 1.60134 |
| NM_181400    | Wdr47         | 0.0233098  | 1.60252 |
| NR_030711    | 2210403K04Rik | 0.0291482  | 1.60401 |
| NM_144848    | Eppk1         | 0.0315379  | 1.60623 |
| NM_133242    | Rbm39         | 0.0152107  | 1.60869 |
| NM_008512    | Tcirg1        | 0.032935   | 1.61099 |
| NM_001136091 | Lrp1          | 0.0392762  | 1.61099 |
| NM_021297    | Tlr4          | 0.00145666 | 1.61156 |
| NM_001145886 | Tiam1         | 0.00904888 | 1.61183 |

|              |               |             |         |
|--------------|---------------|-------------|---------|
| NM_001190852 | Pdlim5        | 0.0229017   | 1.6134  |
| NM_177788    | Exoc3l        | 0.000110233 | 1.61817 |
| ---          | ---           | 0.00510462  | 1.61822 |
| NM_031397    | Bicc1         | 0.0187467   | 1.61874 |
| NM_013468    | Ankrd1        | 0.00423634  | 1.62047 |
| NM_011131    | Pold1         | 0.000858083 | 1.62048 |
| NM_008726    | Nppb          | 0.0126458   | 1.62129 |
| NM_001042660 | Smad7         | 0.0422477   | 1.62309 |
| NM_001081060 | Slc9a3        | 0.0134614   | 1.62365 |
| ---          | ---           | 0.0067945   | 1.62384 |
| NM_001159382 | Gjc1          | 0.0186419   | 1.6239  |
| NM_026883    | 1500011H22Rik | 0.00284332  | 1.62413 |
| ---          | A430081F14Rik | 0.0128436   | 1.62449 |
| NM_028679    | Irak3         | 0.0465505   | 1.62472 |
| NM_175251    | Arid2         | 0.00415759  | 1.62608 |
| ---          | ---           | 0.00102423  | 1.62804 |
| NM_021457    | Fzd1          | 0.00813683  | 1.62825 |
| NM_019574    | Patz1         | 0.0217644   | 1.62964 |

|              |               |            |         |
|--------------|---------------|------------|---------|
| NM_001170785 | Mthfd1l       | 0.0181064  | 1.62993 |
| NM_009775    | Tspo          | 0.0290861  | 1.63148 |
| NM_001146153 | Homer3        | 0.0164549  | 1.63331 |
| NM_009793    | Camk4         | 0.0278867  | 1.63502 |
| NM_025865    | 2310030G06Rik | 0.00193086 | 1.63646 |
| NM_011213    | Ptprf         | 0.0223857  | 1.63722 |
| NM_001190852 | Pdlim5        | 0.0313766  | 1.63723 |
| NM_201359    | Tmem106c      | 0.0421893  | 1.63807 |
| NM_001042611 | Cp            | 0.0049627  | 1.63826 |
| NM_178883    | Gorab         | 0.00165448 | 1.63836 |
| ---          | AA409587      | 0.0270837  | 1.63875 |
| NM_172457    | Mobkl2a       | 0.0243886  | 1.63939 |
| NM_009873    | Cdk6          | 0.00023813 | 1.64043 |
| NM_001163640 | Chn2          | 0.0332201  | 1.64079 |
| NM_001113545 | Lima1         | 0.0424295  | 1.64089 |
| NM_010128    | Emp1          | 0.022463   | 1.64183 |
| NM_001001738 | Itrip         | 0.0222537  | 1.64265 |
| NM_009598    | Ace           | 0.0277095  | 1.64324 |

|              |               |            |         |
|--------------|---------------|------------|---------|
| XR_106238    | LOC100504121  | 0.00174699 | 1.64404 |
| NM_028779    | Ampd2         | 0.0116829  | 1.64553 |
| NM_001145920 | Runx2         | 0.0187745  | 1.6457  |
| NM_016863    | Fkbp1b        | 0.00516157 | 1.64578 |
| NM_007950    | Ereg          | 0.0479737  | 1.64636 |
| NM_133859    | Olfml3        | 0.0476367  | 1.6464  |
| NM_001042674 | Rbpms         | 0.0458291  | 1.64745 |
| NM_010748    | Lyst          | 0.0177767  | 1.64894 |
| ---          | D130051D11Rik | 0.0192419  | 1.64989 |
| NM_023738    | Uba7          | 0.0156378  | 1.65028 |
| NM_029522    | Gpsm2         | 0.00339184 | 1.6506  |
| NM_153056    | Sirt7         | 0.014872   | 1.65175 |
| NM_001111051 | Dclk1         | 0.03908    | 1.65252 |
| NM_001170848 | Luc7l2        | 0.0219041  | 1.65262 |
| NM_001161665 | Kif26b        | 0.00221806 | 1.65301 |
| NM_153167    | Dcaf10        | 0.0200984  | 1.65326 |
| NM_008013    | Fgl2          | 0.0237261  | 1.65431 |
| NM_001136079 | Ptger4        | 0.00575481 | 1.65505 |



|              |               |            |         |
|--------------|---------------|------------|---------|
| NM_010303    | Gna13         | 0.00624515 | 1.65509 |
| NM_145566    | Agfg2         | 0.00384887 | 1.65571 |
| NM_023320    | Plekho1       | 0.0488429  | 1.65625 |
| ---          | LOC552901     | 0.0104363  | 1.6563  |
| NM_001145937 | Odz3          | 0.0141419  | 1.65836 |
| NM_001083316 | Pdgfra        | 0.00213329 | 1.65878 |
| NM_175307    | Fam46b        | 0.00636493 | 1.65919 |
| ---          | 4933436P19Rik | 0.00131016 | 1.66089 |
| NM_010431    | Hif1a         | 0.00360333 | 1.661   |
| NM_144831    | Dhx8          | 0.00934381 | 1.66215 |
| ---          | ---           | 0.0346356  | 1.66279 |
| NM_008885    | Pmp22         | 0.0410397  | 1.66335 |
| ---          | ---           | 0.0206026  | 1.66391 |
| NM_001008238 | Bnip2         | 0.0180247  | 1.66519 |
| NM_009450    | Tubb2a        | 0.0433186  | 1.66611 |
| NM_172684    | Rsbn1         | 0.00138416 | 1.66689 |
| NM_172506    | Boc           | 0.0414573  | 1.66796 |
| NM_009370    | Tgfbr1        | 0.0157243  | 1.66925 |

|              |               |            |         |
|--------------|---------------|------------|---------|
| NM_026965    | Comtd1        | 0.0205761  | 1.67211 |
| ---          | ---           | 0.00769501 | 1.67436 |
| NM_201362    | Ccdc68        | 0.00178021 | 1.67527 |
| NM_172779    | Ddx26b        | 0.012313   | 1.67749 |
| NM_010907    | Nfkbia        | 0.0246277  | 1.67876 |
| NM_030004    | Cryl1         | 0.00112813 | 1.67945 |
| NM_173036    | Gpr97         | 0.0336517  | 1.68075 |
| NM_009260    | Spnb2         | 0.0160624  | 1.68078 |
| ---          | ---           | 0.0386473  | 1.68091 |
| NM_008677    | Ncf4          | 0.0369296  | 1.68095 |
| ---          | ---           | 0.0325523  | 1.68147 |
| NM_001145884 | Itgb5         | 0.0399719  | 1.68328 |
| NM_001159593 | Slc20a1       | 0.0316655  | 1.68693 |
| NM_177265    | 6330512M04Rik | 0.00231747 | 1.68703 |
| NM_001038703 | Gpr146        | 0.00281643 | 1.68755 |
| ---          | ---           | 0.00432397 | 1.68771 |
| NM_016721    | lqgap1        | 0.0186883  | 1.68785 |
| NM_178661    | Creb3l2       | 0.0213158  | 1.68848 |

|              |          |             |         |
|--------------|----------|-------------|---------|
| NM_008540    | Smad4    | 0.00546689  | 1.68866 |
| NM_018820    | Sertad1  | 0.0190089   | 1.6937  |
| NM_010095    | Ebf2     | 0.0185793   | 1.69584 |
| ---          | ---      | 0.0194219   | 1.69626 |
| NM_001081412 | Bcr      | 0.00515035  | 1.69751 |
| NM_008258    | Hn1      | 0.00969731  | 1.69867 |
| NM_011498    | Bhlhe40  | 0.0319333   | 1.69979 |
| XR_035177    | AB041803 | 0.00709371  | 1.70064 |
| NM_139143    | Slc39a6  | 0.00487053  | 1.70262 |
| NM_001134791 | Osbpl9   | 0.00670928  | 1.7059  |
| NM_133242    | Rbm39    | 0.000317138 | 1.70701 |
| NM_001163394 | Evl      | 0.00117209  | 1.70739 |
| NM_025830    | Wwp2     | 0.0405515   | 1.70818 |
| NM_152804    | Plk2     | 0.0288299   | 1.70871 |
| ---          | LOC75771 | 0.0286969   | 1.71005 |
| NM_001079908 | Fgfr1    | 0.0207325   | 1.71402 |
| NM_133237    | Apcdd1   | 0.00754895  | 1.71521 |
| NM_033325    | Loxl2    | 0.0476868   | 1.71549 |

|              |               |             |         |
|--------------|---------------|-------------|---------|
| ---          | ---           | 0.0250125   | 1.71555 |
| NM_028041    | Ddx54         | 0.000201992 | 1.71592 |
| ---          | 9630010G10Rik | 0.0169913   | 1.71653 |
| NM_001136086 | Dclk1         | 0.00649956  | 1.71973 |
| NM_001111051 | Dpysl3        | 0.0363477   | 1.71973 |
| NM_013750    | Phlda3        | 0.027646    | 1.72002 |
| NM_001162477 | Gab2          | 0.0155305   | 1.72159 |
| NM_175096    | Stbd1         | 0.0235064   | 1.73519 |
| NM_181585    | Pik3r3        | 0.0195781   | 1.73565 |
| NM_025494    | Atp6v1c1      | 0.00140299  | 1.73591 |
| NM_001166408 | Rai14         | 0.0443347   | 1.73801 |
| NM_009777    | C1qb          | 0.00939662  | 1.73939 |
| NM_009888    | Cfh           | 0.0439377   | 1.74104 |
| NR_015512    | 4933406K04Rik | 0.0217492   | 1.74425 |
| NM_008555    | Masp1         | 0.00957535  | 1.74722 |
| NM_019703    | Pfkp          | 0.0167414   | 1.74756 |
| NM_133187    | Fam198b       | 0.0292785   | 1.75127 |
| NM_013519    | Foxc2         | 0.0423867   | 1.75944 |

|              |         |             |         |
|--------------|---------|-------------|---------|
| ---          | ---     | 0.0233879   | 1.76142 |
| NM_175291    | Dock10  | 0.0369492   | 1.76526 |
| NM_001163481 | Fkbp10  | 0.0473724   | 1.76725 |
| NM_133662    | Ier3    | 0.0386572   | 1.76842 |
| NM_011955    | Nubp1   | 0.0206955   | 1.76887 |
| NM_001081379 | Ankrd11 | 0.0168978   | 1.7696  |
| NM_146057    | Dap     | 0.0362386   | 1.76965 |
| NM_011141    | Pou3f1  | 0.00953835  | 1.77013 |
| NM_009930    | Col3a1  | 0.0495996   | 1.7752  |
| NR_002870    | Dnm3os  | 0.0180623   | 1.77643 |
| NM_001081249 | Vcan    | 0.0144663   | 1.77733 |
| NM_010422    | Hexb    | 0.0433772   | 1.77916 |
| NM_025994    | Efhd2   | 0.035741    | 1.78112 |
| NM_023739    | Nfx1    | 0.000264336 | 1.78297 |
| NM_009728    | Atp10a  | 0.00233056  | 1.78648 |
| NM_008597    | Mgp     | 0.0316297   | 1.78834 |
| NM_145456    | Zswim6  | 0.000572733 | 1.7892  |
| NM_001039169 | Eif4e2  | 0.00263961  | 1.79058 |

|              |               |             |         |
|--------------|---------------|-------------|---------|
| NM_001145884 | Itgb5         | 0.0206102   | 1.79297 |
| NM_133242    | Rbm39         | 0.000354051 | 1.79694 |
| NM_010917    | Nid1          | 0.00936676  | 1.79708 |
| NM_001163262 | 4933407C03Rik | 0.0430006   | 1.79708 |
| NM_021028    | Tk2           | 0.0181258   | 1.7975  |
| NM_008788    | Pcolce        | 0.0161879   | 1.80012 |
| NM_001167967 | Ankrd10       | 0.000648445 | 1.806   |
| NM_011193    | Pstpip1       | 0.0051681   | 1.80699 |
| NM_152808    | Slc44a2       | 0.0365524   | 1.80742 |
| NM_010657    | Hivep3        | 0.00676547  | 1.80859 |
| NM_008540    | Smad4         | 0.00082919  | 1.80914 |
| NM_010493    | Icam1         | 0.0436689   | 1.81142 |
| NM_175259    | Shisa4        | 0.0318261   | 1.81199 |
| NM_170591    | Nupl1         | 0.000414765 | 1.81355 |
| NM_030152    | Nol3          | 0.0457938   | 1.81454 |
| NM_011670    | Uchl1         | 0.0266694   | 1.81681 |
| NM_001033355 | Zfp568        | 0.00396781  | 1.82772 |
| NM_008813    | Enpp1         | 0.0160347   | 1.8289  |

|              |               |             |         |
|--------------|---------------|-------------|---------|
| NM_001190320 | Clec4n        | 0.0431881   | 1.83328 |
| NM_001172098 | Strn3         | 0.00861259  | 1.83755 |
| NM_031397    | Bicc1         | 0.00121018  | 1.84081 |
| NM_010169    | F2r           | 0.00510646  | 1.84141 |
| ---          | ---           | 0.00588849  | 1.84631 |
| NM_025635    | Zwint         | 0.0362204   | 1.8496  |
| ---          | ---           | 0.000941382 | 1.85672 |
| NM_001083120 | Enah          | 0.00554826  | 1.86278 |
| NM_008788    | Pcolce        | 0.0127666   | 1.86403 |
| ---          | ---           | 7.68E-05    | 1.86691 |
| NM_001126490 | lsm1          | 0.0155586   | 1.86743 |
| ---          | ---           | 0.00462493  | 1.86771 |
| NM_033327    | Zfp423        | 0.0427279   | 1.86827 |
| NM_153098    | Cd109         | 0.010052    | 1.86853 |
| NM_001110320 | Cd72          | 0.00301917  | 1.87324 |
| NM_007459    | Ap2a2         | 0.0200508   | 1.87485 |
| NM_198006    | 6330578E17Rik | 0.0114601   | 1.87486 |
| NM_011175    | Lgmn          | 0.0274195   | 1.87499 |

|              |               |             |         |
|--------------|---------------|-------------|---------|
| NM_026054    | 2810474O19Rik | 0.0397429   | 1.87821 |
| NM_001083895 | Srpx2         | 0.0223924   | 1.88054 |
| NM_183168    | P2ry6         | 0.0298551   | 1.8821  |
| NM_025454    | Ing5          | 0.000192139 | 1.88431 |
| NM_007739    | Col8a1        | 0.00187047  | 1.8856  |
| NM_013630    | Pkd1          | 0.00925167  | 1.88848 |
| NM_172870    | Bnc2          | 0.00426728  | 1.88982 |
| NM_001177980 | Pde4b         | 0.0334598   | 1.8919  |
| NM_001177371 | Dbn1          | 0.0320089   | 1.89399 |
| NM_025445    | Arfgap3       | 0.00412732  | 1.9033  |
| NM_001145198 | 1500009L16Rik | 0.0128875   | 1.90347 |
| NM_009777    | C1qb          | 0.0340163   | 1.90753 |
| NM_181409    | Mtmr11        | 0.0414341   | 1.91531 |
| NM_010329    | Pdpn          | 0.0432224   | 1.91713 |
| NM_001081286 | Fat1          | 0.0119132   | 1.91964 |
| NM_008520    | Ltbp3         | 0.0184044   | 1.93407 |
| NM_001083120 | Enah          | 0.0442453   | 1.93588 |
| NM_007805    | Cyb561        | 0.0468646   | 1.93646 |



|              |               |            |         |
|--------------|---------------|------------|---------|
| NM_001136086 | Dpysl3        | 0.0108445  | 1.94362 |
| NM_001001999 | Gp1bb         | 0.0218589  | 1.94556 |
| NM_008320    | Irf8          | 0.0378329  | 1.9537  |
| NM_001159394 | Nfkbiz        | 0.0330129  | 1.95474 |
| NM_009775    | Tspo          | 0.0367904  | 1.95738 |
| NM_007679    | Cebpd         | 0.0422697  | 1.96181 |
| XR_105187    | E230013L22Rik | 0.0143254  | 1.98342 |
| NM_008540    | Smad4         | 0.00189893 | 1.9869  |
| NM_008047    | Fstl1         | 0.0157236  | 1.98691 |
| NM_011985    | Mmp23         | 0.0239378  | 1.98871 |
| NM_001042534 | Capg          | 0.0259814  | 1.99592 |
| NM_175132    | Synpo2l       | 0.0257704  | 1.99612 |
| NM_026835    | Ms4a6d        | 0.0345989  | 2.00013 |
| NM_011985    | Mmp23         | 0.040869   | 2.01691 |
| NM_001039090 | Skil          | 0.00623228 | 2.02577 |
| NM_001081249 | Vcan          | 0.032536   | 2.03594 |
| NM_007707    | Socs3         | 0.0314718  | 2.04608 |
| NM_001082553 | Rab27b        | 0.00687425 | 2.04935 |

|              |          |            |         |
|--------------|----------|------------|---------|
| NM_021476    | Cysltr1  | 0.0223014  | 2.05471 |
| NM_009775    | Tspo     | 0.0445692  | 2.05488 |
| NM_001190852 | Pdlim5   | 0.00127165 | 2.05617 |
| ---          | ---      | 0.0135442  | 2.06312 |
| NM_001111051 | Dclk1    | 0.0178888  | 2.06478 |
| NM_001159394 | Nfkbiz   | 0.0239625  | 2.06626 |
| NM_021342    | Kcne4    | 0.0126956  | 2.06983 |
| NM_008813    | Enpp1    | 0.0116252  | 2.06985 |
| NM_007739    | Col8a1   | 0.0089125  | 2.07039 |
| NM_133187    | Fam198b  | 0.00845949 | 2.0902  |
| NM_022814    | Svep1    | 0.0491423  | 2.09057 |
| NM_028186    | Nkd2     | 0.0169193  | 2.0951  |
| NM_022004    | Fxyd6    | 0.0446828  | 2.09598 |
| NM_001002011 | Lmna     | 0.0163998  | 2.09659 |
| NM_001136086 | Dpysl3   | 0.00939156 | 2.09926 |
| NM_009142    | Cx3cl1   | 0.0241068  | 2.10155 |
| NM_025994    | Efhd2    | 0.0104847  | 2.10755 |
| NM_011340    | Serpinf1 | 0.0430676  | 2.10918 |

|              |         |             |         |
|--------------|---------|-------------|---------|
| NM_007569    | Btg1    | 0.0057666   | 2.11795 |
| NM_029620    | Pcolce2 | 0.0305931   | 2.11914 |
| NM_024226    | Rtn4    | 0.0207242   | 2.13092 |
| NM_028623    | Cst6    | 0.0224348   | 2.14296 |
| NM_031380    | Fstl3   | 0.0168709   | 2.14422 |
| NM_007542    | Bgn     | 0.0226955   | 2.15251 |
| NM_146153    | Thrap3  | 3.75E-05    | 2.1584  |
| NM_020510    | Fzd2    | 0.0238457   | 2.16551 |
| NM_001081280 | Nlrc3   | 0.0199223   | 2.18152 |
| NM_008037    | Fosl2   | 0.0349316   | 2.18341 |
| NM_172863    | Zfp697  | 0.00410926  | 2.1868  |
| NM_001145937 | Odz3    | 0.00311181  | 2.18936 |
| NM_175643    | Adamts2 | 0.0471795   | 2.1961  |
| NM_007755    | Cpeb1   | 0.00743287  | 2.2015  |
| NM_007737    | Col5a2  | 0.0349654   | 2.20268 |
| NM_001037723 | Adcy7   | 0.0148318   | 2.2048  |
| NM_008047    | Fstl1   | 0.00950139  | 2.21994 |
| ---          | ---     | 0.000112608 | 2.22905 |

|              |               |             |         |
|--------------|---------------|-------------|---------|
| NM_007780    | Csf2rb        | 0.0148951   | 2.2394  |
| NM_022995    | Pmepa1        | 0.0185868   | 2.25177 |
| NM_001136079 | Ptger4        | 0.00512675  | 2.26191 |
| NM_019482    | Panx1         | 0.0379027   | 2.263   |
| NM_010516    | Cyr61         | 0.0189362   | 2.27002 |
| ---          | C130075A20Rik | 0.00673959  | 2.2815  |
| NM_001160378 | Fam46a        | 0.00707141  | 2.28591 |
| NM_001077361 | Fhl1          | 0.00582684  | 2.28621 |
| NM_011356    | Frzb          | 0.00885068  | 2.28665 |
| NM_145358    | Camkk2        | 0.000992931 | 2.29466 |
| NM_001164433 | Mical1        | 0.0155318   | 2.3019  |
| NM_009255    | Serpine2      | 0.000738636 | 2.32091 |
| NM_007542    | Bgn           | 0.0227202   | 2.32558 |
| NR_002847    | Malat1        | 0.00120669  | 2.35986 |
| NM_010516    | Cyr61         | 0.00572304  | 2.40979 |
| NM_008630    | Mt2           | 0.0370624   | 2.41638 |
| NM_001163481 | Fkbp10        | 0.0258958   | 2.42991 |
| NM_178740    | Slitrk4       | 0.00691951  | 2.47566 |

|           |          |            |         |
|-----------|----------|------------|---------|
| NM_009367 | Tgfb2    | 0.0263895  | 2.48076 |
| NM_015776 | Mfap5    | 0.0407546  | 2.50964 |
| NM_175643 | Adamts2  | 0.0301511  | 2.5215  |
| NM_010809 | Mmp3     | 0.0281599  | 2.52905 |
| NM_020510 | Fzd2     | 0.0210461  | 2.54591 |
| NM_007739 | Col8a1   | 0.00394766 | 2.54624 |
| NM_015760 | Nox4     | 0.0289113  | 2.5747  |
| NM_007730 | Col12a1  | 0.0135607  | 2.59123 |
| NM_026993 | Ddah1    | 0.00393302 | 2.61456 |
| NM_019687 | Slc22a4  | 0.00891114 | 2.62652 |
| NM_199473 | Col8a2   | 0.0279717  | 2.63823 |
| NM_146162 | Tmem119  | 0.018716   | 2.64641 |
| NM_029981 | Adamtsl2 | 0.0346479  | 2.65754 |
| NM_145467 | Itgbl1   | 0.0180991  | 2.67006 |
| NM_008489 | Lbp      | 0.0386686  | 2.7128  |
| NM_175132 | Synpo2l  | 0.0155483  | 2.72779 |
| NM_026280 | Mxra7    | 0.0061818  | 2.73991 |
| NM_009367 | Tgfb2    | 0.0095319  | 2.74377 |

|              |          |             |         |
|--------------|----------|-------------|---------|
| NM_007737    | Col5a2   | 0.0329915   | 2.87415 |
| NM_013586    | Lox3     | 0.0209206   | 2.91163 |
| NM_010444    | Nr4a1    | 0.0418638   | 2.93432 |
| NM_001110146 | Prg4     | 0.0045605   | 2.99719 |
| NM_199222    | Lman1l   | 0.0174616   | 3.058   |
| NM_010217    | Ctgf     | 0.0085363   | 3.13847 |
| NM_021443    | Ccl8     | 0.045683    | 3.20649 |
| NM_016873    | Wisp2    | 0.0146351   | 3.32207 |
| NM_007739    | Col8a1   | 0.00161066  | 3.33338 |
| NM_027120    | Itgb1bp3 | 0.0119921   | 3.40182 |
| NM_001198765 | Postn    | 0.0349655   | 3.48161 |
| NM_001109914 | Apold1   | 0.0481336   | 3.66932 |
| NM_173385    | Cilp     | 0.0175155   | 3.79064 |
| NM_009367    | Tgfb2    | 0.000780175 | 3.86931 |
| NM_010516    | Cyr61    | 0.0306455   | 4.04138 |
| NM_008871    | Serpine1 | 0.00773735  | 4.25023 |
| NM_001044384 | Timp1    | 0.0175882   | 4.30689 |
| NM_010516    | Cyr61    | 0.0166162   | 4.41272 |

|           |       |            |         |
|-----------|-------|------------|---------|
| NM_010234 | Fos   | 0.0441524  | 4.55377 |
| NM_080728 | Myh7  | 0.00464255 | 4.55859 |
| NM_013589 | Ltbp2 | 0.0157405  | 4.9651  |
| NM_018827 | Crlf1 | 0.0167992  | 5.17302 |
| NM_009263 | Spp1  | 0.0413696  | 6.11439 |
| NM_010050 | Dio2  | 0.0210702  | 6.33331 |
