# Supplementary material for: Deletion of low molecular weight protein tyrosine phosphatase (Acp1) protects against stress‐induced cardiomyopathy
Source: PubMed Central journal article supplement — J Pathol. 2015 Sep 1;237(4):482–94. doi: 10.1002/path.4594 (PMC5049627; doi:10.1002/path.4594), 2015-09-01
Supplement: PATH-237-482-s015.pdf [file PATH-237-482-s015.pdf]

**Supplementary Table S6:** Microarray data showing the 419 genes differentially regulated (205 were down-regulated and 214 were up-regulated) in *Acp1*<sup>-/-</sup> TAC hearts vs. *Acp1*<sup>+/+</sup> TAC hearts. Only genes expression with fold changes  $\geq 1.5$  (up-regulated) or  $\leq -1.5$  (down-regulated) and p-value  $< 0.05$  were considered statistically significant (n=5).

| RefSeq Transcript ID | Gene Symbol   | p-value (-/- tac vs. +/+ tac) | Fold-change (-/- tac vs. +/+ tac) |
|----------------------|---------------|-------------------------------|-----------------------------------|
| NM_001109992         | Ptpn11        | 0.0130775                     | 1.79759                           |
| NR_002860            | 1200003I10Rik | 0.00186989                    | 1.71713                           |
| NM_001039376         | Pde4dip       | 0.018934                      | 1.51667                           |
| NM_146200            | Eif3c         | 0.017101                      | 1.4764                            |
| NR_002860            | 1200015M12Rik | 0.0156674                     | 1.42515                           |
| ---                  | ---           | 0.00909618                    | 1.42199                           |
| ---                  | ---           | 0.00147724                    | 1.39871                           |
| NM_027884            | Tns1          | 0.012316                      | 1.38931                           |
| NM_013835            | Trove2        | 0.0196522                     | 1.37694                           |
| NM_001145885         | Ddx4          | 0.00977795                    | 1.37657                           |
| NM_001164370         | Mipol1        | 0.018266                      | 1.37076                           |
| NM_145528            | Atg13         | 0.0197142                     | 1.3703                            |
| NM_001130409         | Ptk2          | 0.00516377                    | 1.37008                           |

|              |               |             |         |
|--------------|---------------|-------------|---------|
| ---          | ---           | 0.00257531  | 1.36708 |
| NM_018852    | Scn9a         | 0.0173058   | 1.36649 |
| NM_207541    | Zfp81         | 0.000374977 | 1.36239 |
| NM_001042752 | Neo1          | 0.000539937 | 1.35693 |
| NM_007894    | Ear1          | 0.0187441   | 1.35453 |
| NM_007715    | Clock         | 0.000219222 | 1.34282 |
| ---          | ---           | 0.00434433  | 1.33874 |
| NM_001110327 | Dmtf1         | 0.0192496   | 1.33749 |
| NM_033314    | Slco2a1       | 0.00582085  | 1.33386 |
| NM_011158    | Prkar2b       | 0.00282267  | 1.33005 |
| NM_010848    | Myb           | 0.00451665  | 1.3291  |
| NM_001001177 | BC051142      | 0.00999912  | 1.32756 |
| NM_029844    | Mrap          | 0.00733161  | 1.32699 |
| ---          | ---           | 0.0155863   | 1.32551 |
| NM_001081045 | 1700081L11Rik | 0.000747542 | 1.32538 |
| NM_010568    | Insr          | 0.0115446   | 1.32394 |
| NM_016779    | Dmp1          | 0.0166408   | 1.32332 |
| NM_025859    | Arl1          | 0.017956    | 1.32321 |

|              |               |             |         |
|--------------|---------------|-------------|---------|
| NM_009229    | Sntb2         | 0.0156059   | 1.32111 |
| ---          | 8430419K02Rik | 0.00662268  | 1.32108 |
| NM_001025565 | Lhx9          | 0.0143272   | 1.31477 |
| NM_001048176 | Cerkl         | 0.0118049   | 1.31447 |
| NM_010804    | Mllt10        | 0.0126623   | 1.31351 |
| NM_001098170 | Pcdh10        | 0.0167334   | 1.31249 |
| NM_009705    | Arg2          | 0.00328058  | 1.31226 |
| ---          | 4921527H02Rik | 0.000295337 | 1.31129 |
| ---          | 2900022M07Rik | 0.0162081   | 1.31044 |
| NM_001004367 | Cxxc4         | 0.000439341 | 1.30793 |
| NM_008779    | Cntn3         | 0.0191544   | 1.30529 |
| NM_008449    | Kif5c         | 0.00894185  | 1.30301 |
| NM_054051    | Pip4k2b       | 0.0133669   | 1.30217 |
| XR_106421    | LOC100216343  | 0.0155613   | 1.30184 |
| NM_001042611 | Cp            | 0.0178343   | 1.30139 |
| ---          | A830039H05Rik | 0.00314213  | 1.30104 |
| NM_029953    | Arhgef38      | 0.00267471  | 1.29977 |
| ---          | AA407107      | 0.00429703  | 1.2996  |

|              |               |            |         |
|--------------|---------------|------------|---------|
| ---          | ---           | 0.0155558  | 1.29183 |
| ---          | ---           | 0.0125581  | 1.29108 |
| NR_033502    | C030023E24Rik | 0.0175527  | 1.29018 |
| NM_008371    | Il7           | 0.0028388  | 1.28874 |
| NM_153550    | Dirc2         | 0.00261149 | 1.28521 |
| NM_001033288 | Gm106         | 0.0114287  | 1.28405 |
| XR_104866    | 2310067E19Rik | 0.00916752 | 1.28059 |
| XR_105119    | A730056A06Rik | 0.0174508  | 1.2805  |
| NM_020608    | Cramp1l       | 0.00419272 | 1.27976 |
| ---          | ---           | 0.00523736 | 1.2794  |
| NM_018755    | Pgcp          | 0.00705513 | 1.27865 |
| ---          | 4933423N03Rik | 0.00725706 | 1.27829 |
| ---          | 6030451C04Rik | 0.0160025  | 1.27637 |
| ---          | ---           | 0.00793491 | 1.27634 |
| ---          | ---           | 0.0110552  | 1.2753  |
| ---          | AU018740      | 0.0101238  | 1.27493 |
| NR_033518    | Gm16039       | 0.00572196 | 1.2748  |
| ---          | 4933426B08Rik | 0.0157878  | 1.27396 |

|              |               |             |         |
|--------------|---------------|-------------|---------|
| XM_001472971 | 3110054G05Rik | 0.00291414  | 1.27138 |
| NM_010878    | Nck1          | 0.00139663  | 1.27109 |
| NM_007560    | Bmpr1b        | 0.0142265   | 1.26847 |
| ---          | 5230400M06Rik | 0.00898631  | 1.26815 |
| ---          | ---           | 0.00915556  | 1.26814 |
| ---          | ---           | 0.0137366   | 1.2678  |
| ---          | ---           | 0.0123671   | 1.26724 |
| ---          | ---           | 0.000860503 | 1.26668 |
| ---          | 9030425L15Rik | 0.00711487  | 1.26665 |
| NM_010441    | Hmga2         | 0.0182571   | 1.26647 |
| NM_027652    | Ept1          | 0.0184572   | 1.26639 |
| ---          | ---           | 0.00617747  | 1.26603 |
| ---          | C80678        | 0.00294489  | 1.26591 |
| NM_001177579 | Gm10471       | 0.0153826   | 1.26384 |
| ---          | 8430437B07Rik | 0.00718051  | 1.26349 |
| ---          | ---           | 0.0083321   | 1.26314 |
| NM_178115    | 2700050L05Rik | 0.00454865  | 1.26253 |
| NM_021714    | Wbp11         | 0.00662896  | 1.26174 |

|              |               |            |         |
|--------------|---------------|------------|---------|
| NM_022985    | Zfand6        | 0.0183983  | 1.26131 |
| ---          | ---           | 0.0167876  | 1.26057 |
| NM_013668    | Kdm5c         | 0.010481   | 1.25894 |
| NM_024414    | Stx1b         | 0.0011318  | 1.25852 |
| NM_001001984 | Kdm2a         | 0.0157139  | 1.25718 |
| NM_001033233 | Tmprss11a     | 0.012806   | 1.25672 |
| NM_001035531 | Adrbk2        | 0.0119543  | 1.2566  |
| NM_001039692 | Arhgap12      | 0.00823052 | 1.2555  |
| NM_011613    | Tnfsf11       | 0.0132289  | 1.25524 |
| ---          | 4930518F22Rik | 0.0156056  | 1.25431 |
| ---          | ---           | 0.0155653  | 1.254   |
| ---          | ---           | 0.018404   | 1.25319 |
| NM_001177615 | Arpp21        | 0.01641    | 1.25193 |
| ---          | ---           | 0.00702257 | 1.25149 |
| NM_028066    | F11           | 0.0155305  | 1.24988 |
| XM_001477226 | 2410141K09Rik | 0.0029323  | 1.24966 |
| ---          | 9030405F24Rik | 0.0139125  | 1.24864 |
| NM_145383    | Rho           | 0.00648838 | 1.24851 |

|              |               |            |         |
|--------------|---------------|------------|---------|
| NM_019457    | Lrrc6         | 0.0123263  | 1.24763 |
| NM_145617    | Herc1         | 0.0168393  | 1.24709 |
| ---          | 4921522E08Rik | 0.00379762 | 1.24622 |
| NM_008477    | Ktn1          | 0.0168048  | 1.24616 |
| NM_173444    | Nbeal1        | 0.0116161  | 1.24572 |
| NM_145997    | Kdm5a         | 0.00642381 | 1.24564 |
| ---          | 3110027N22Rik | 0.0028902  | 1.24388 |
| ---          | ---           | 0.0014298  | 1.2429  |
| NM_025707    | Klhl28        | 0.0195243  | 1.2429  |
| NM_001025392 | Bclaf1        | 0.00967401 | 1.24167 |
| NM_010148    | Epn2          | 0.00387779 | 1.24025 |
| ---          | 4933406B15Rik | 0.0164941  | 1.23982 |
| ---          | ---           | 0.017165   | 1.23955 |
| XM_001481164 | 1190002F15Rik | 0.00983359 | 1.23945 |
| NM_133718    | Tmem30a       | 0.00696551 | 1.23742 |
| NM_009539    | Zap70         | 0.00616455 | 1.2374  |
| NM_175032    | Galnt16       | 0.00516852 | 1.23686 |
| NM_175020    | BC048599      | 0.0188252  | 1.23519 |

|              |               |            |         |
|--------------|---------------|------------|---------|
| NM_011767    | Zfr           | 0.00272921 | 1.23507 |
| ---          | ---           | 0.0130111  | 1.23422 |
| NM_028946    | Nhedc1        | 0.00579224 | 1.23336 |
| NM_001166457 | Brcc3         | 0.00629852 | 1.23284 |
| ---          | 4931431B13Rik | 0.00594733 | 1.23068 |
| ---          | ---           | 0.0126199  | 1.2301  |
| NM_145991    | Cdc73         | 0.0134537  | 1.22973 |
| NM_026005    | 2610301B20Rik | 0.00228931 | 1.22884 |
| ---          | 3110062G12Rik | 0.0111515  | 1.22828 |
| NM_028958    | Taf7l         | 0.0153812  | 1.22769 |
| NM_177331    | Gen1          | 0.0196959  | 1.22662 |
| NM_001037841 | Cklf          | 0.0150789  | 1.22657 |
| ---          | ---           | 0.00881828 | 1.2243  |
| ---          | 2900064F13Rik | 0.0113151  | 1.22376 |
| NM_001079847 | Gpr64         | 0.0178469  | 1.22364 |
| ---          | ---           | 0.00432219 | 1.22342 |
| NM_008746    | Ntrk3         | 5.62E-05   | 1.22314 |
| NM_001098170 | Pcdh10        | 0.00345938 | 1.22276 |



|              |               |            |         |
|--------------|---------------|------------|---------|
| NM_007496    | Zfhx3         | 0.00976068 | 1.22275 |
| NM_008638    | Mthfd2        | 0.0112743  | 1.22237 |
| ---          | ---           | 0.0178981  | 1.22226 |
| NM_029949    | Snpc3         | 0.0097222  | 1.22221 |
| ---          | 2700057C20Rik | 0.00872389 | 1.22206 |
| ---          | Gm568         | 0.0198738  | 1.22193 |
| NM_001113414 | Ebf3          | 0.0131599  | 1.22185 |
| ---          | ---           | 0.0164082  | 1.22174 |
| ---          | 2610528B01Rik | 0.00848383 | 1.22149 |
| NM_001162906 | 2410089E03Rik | 0.0114155  | 1.22105 |
| NM_016686    | Vezf1         | 0.00770451 | 1.22068 |
| NM_007758    | Cr2           | 0.0163667  | 1.22041 |
| NM_133692    | Pold3         | 0.00817828 | 1.22015 |
| NM_201258    | Oog3          | 0.00601308 | 1.21975 |
| NM_020293    | Cldn9         | 0.00482748 | 1.2195  |
| ---          | ---           | 0.0186736  | 1.21912 |
| XR_105785    | G730013B05Rik | 0.00455733 | 1.21898 |
| NM_001042653 | Oip5          | 0.0094694  | 1.21893 |

|              |               |            |         |
|--------------|---------------|------------|---------|
| NM_001033819 | 9130409I23Rik | 0.00394192 | 1.21888 |
| NM_173451    | Arsj          | 0.00341692 | 1.21875 |
| ---          | AA675344      | 0.00462028 | 1.21842 |
| NM_029835    | 5730590G19Rik | 0.0145936  | 1.21841 |
| ---          | ---           | 0.0179334  | 1.21817 |
| NM_001033210 | Pls1          | 0.00564068 | 1.21816 |
| NM_054066    | Plcz1         | 0.00728869 | 1.21798 |
| ---          | ---           | 0.0147377  | 1.21684 |
| ---          | ---           | 0.00149955 | 1.21644 |
| ---          | D15Ertd55e    | 0.0104162  | 1.21643 |
| ---          | ---           | 0.00641916 | 1.21638 |
| NM_177772    | Bpil2         | 0.0149519  | 1.21635 |
| NM_027801    | 2610015P09Rik | 0.0153519  | 1.21556 |
| NM_028593    | Cybrd1        | 0.0153519  | 1.21475 |
| NM_172430    | Sphkap        | 0.00841648 | 1.21452 |
| ---          | ---           | 0.0149126  | 1.21415 |
| NM_027892    | Ppp1r12a      | 0.0109131  | 1.21384 |
| ---          | 9130221J17Rik | 0.0142768  | 1.21251 |

|              |               |            |         |
|--------------|---------------|------------|---------|
| NM_001001319 | Gm13102       | 0.00630353 | 1.21242 |
| ---          | ---           | 0.00819634 | 1.21236 |
| NM_019569    | Fscn3         | 0.00164281 | 1.21166 |
| XR_105421    | 1700028I16Rik | 0.013696   | 1.21103 |
| NR_030689    | 4930539J05Rik | 0.0192282  | 1.21081 |
| NM_001081017 | Unc79         | 0.0160566  | 1.21046 |
| ---          | ---           | 0.0127003  | 1.21003 |
| ---          | ---           | 0.0151462  | 1.2096  |
| NM_183296    | Krtap16-10    | 0.0179553  | 1.20921 |
| ---          | 8430437N05Rik | 0.0128809  | 1.20906 |
| NM_053215    | Ugt2b37       | 0.0199481  | 1.20906 |
| NM_009991    | Cyp11b2       | 0.0117805  | 1.20896 |
| NM_001037846 | Cnot2         | 0.00590415 | 1.20857 |
| ---          | 2610030P05Rik | 0.00381995 | 1.20847 |
| ---          | ---           | 0.018876   | 1.20816 |
| XR_105272    | LOC100504522  | 0.0175275  | 1.2074  |
| NM_145482    | Setd4         | 0.00181379 | 1.20734 |
| ---          | ---           | 0.010543   | 1.20722 |

|              |            |            |         |
|--------------|------------|------------|---------|
| ---          | ---        | 0.00465904 | 1.20704 |
| ---          | D1ErtD273e | 0.0069919  | 1.20659 |
| ---          | ---        | 0.0169903  | 1.20648 |
| NM_015793    | Fbxw14     | 0.0164501  | 1.20607 |
| NM_008239    | Foxq1      | 0.00685154 | 1.205   |
| NM_174885    | Adam6a     | 0.00668459 | 1.20464 |
| ---          | ---        | 0.00750058 | 1.20444 |
| NM_001109759 | Fam71a     | 0.0127611  | 1.20435 |
| NM_008731    | Npy2r      | 0.0189609  | 1.20421 |
| NM_175500    | Gpc5       | 0.00803873 | 1.20359 |
| ---          | ---        | 0.0155727  | 1.20283 |
| NM_007674    | Cdx4       | 0.00757154 | 1.20276 |
| ---          | ---        | 0.0150662  | 1.20255 |
| ---          | ---        | 0.00495238 | 1.20174 |
| ---          | ---        | 0.0161928  | 1.20168 |
| NM_026775    | Tmed10     | 0.0188062  | 1.20129 |
| NM_001177481 | Defa5      | 0.00542472 | 1.20108 |
| NM_001112796 | Bicd1      | 0.00734861 | 1.20106 |

|              |               |            |          |
|--------------|---------------|------------|----------|
| ---          | ---           | 0.00460454 | 1.20079  |
| NM_001174086 | Shisa9        | 0.0171828  | 1.20063  |
| ---          | 1110069O07Rik | 0.0191289  | 1.2005   |
| NM_153083    | Thtpa         | 0.0103265  | -1.20175 |
| NM_001030307 | Dkc1          | 0.00229412 | -1.20197 |
| NM_033134    | Inpp5e        | 0.0165344  | -1.20206 |
| NM_027250    | 2010305A19Rik | 0.00590533 | -1.20219 |
| XR_001632    | 2410017P09Rik | 0.013277   | -1.20263 |
| XM_001474786 | 4930470H14Rik | 0.00113187 | -1.20293 |
| NM_009837    | Cct4          | 0.00336918 | -1.20322 |
| NM_018742    | Bet1l         | 0.0115353  | -1.20322 |
| NM_007622    | Cbx1          | 0.00320393 | -1.20375 |
| NM_022313    | Eral1         | 9.28E-05   | -1.20432 |
| NM_001013385 | Grm4          | 0.0162935  | -1.20531 |
| NM_026549    | Pdcd2l        | 0.0154689  | -1.20587 |
| NM_015755    | Hunk          | 0.00461297 | -1.20651 |
| NM_027464    | 5730469M10Rik | 0.00152151 | -1.20705 |
| NM_144514    | Commd1        | 0.0039174  | -1.20744 |

|              |               |            |          |
|--------------|---------------|------------|----------|
| NM_172771    | Dmxd2         | 0.00434847 | -1.20823 |
| NM_025676    | Mcm8          | 0.00577717 | -1.20932 |
| NM_001013375 | Utp18         | 0.0154158  | -1.20942 |
| NM_153540    | C85492        | 0.0113127  | -1.20964 |
| NM_001159527 | Wdr35         | 0.0110711  | -1.21056 |
| NM_020295    | Lmbr1         | 0.00754501 | -1.2106  |
| NM_001033227 | Slc5a10       | 0.00592675 | -1.21081 |
| NM_001177770 | Clcc1         | 0.0107119  | -1.21125 |
| NM_008026    | Fli1          | 0.0186177  | -1.21204 |
| NM_001100606 | Adat3         | 0.00338029 | -1.21206 |
| NM_001081359 | Ubr5          | 0.00364943 | -1.21217 |
| NM_001170540 | Btf3          | 0.00797023 | -1.21223 |
| NM_001026211 | Dnajc19       | 0.00598502 | -1.21232 |
| NM_001114977 | 2610101N10Rik | 0.00459894 | -1.21241 |
| NM_026774    | Hbxip         | 0.0144592  | -1.21295 |
| NM_178653    | Sccpdh        | 0.0106973  | -1.21311 |
| NM_027000    | Gtpbp4        | 0.00434872 | -1.2141  |
| NM_026534    | Ubxn2b        | 0.0170554  | -1.21535 |

|              |         |            |          |
|--------------|---------|------------|----------|
| NM_177066    | Tnni3k  | 0.0169073  | -1.21616 |
| NM_024188    | Oxct1   | 0.011451   | -1.21637 |
| NM_153775    | Ctu2    | 0.0152255  | -1.21645 |
| NM_008961    | Pter    | 0.00798066 | -1.21656 |
| NM_023053    | Twsg1   | 0.00886126 | -1.21687 |
| NM_011563    | Prdx2   | 0.00841665 | -1.21871 |
| NM_007681    | Cenpa   | 0.0105232  | -1.21938 |
| NM_147778    | Commd3  | 0.00966605 | -1.2197  |
| NM_013902    | Fkbp3   | 0.00949065 | -1.21988 |
| NM_027016    | Sec62   | 0.0184956  | -1.22019 |
| NM_001025438 | Camk2d  | 0.008801   | -1.22092 |
| NM_025464    | Tmem218 | 0.0014144  | -1.22122 |
| NM_026708    | Tlcd1   | 0.0133886  | -1.22155 |
| NM_177359    | Zfp799  | 0.00891167 | -1.22157 |
| NM_020295    | Lmbr1   | 0.00616267 | -1.2224  |
| NM_015769    | Ercc4   | 0.00133708 | -1.22278 |
| NM_001177980 | Pde4b   | 0.00514037 | -1.223   |
| NM_009541    | Zbtb17  | 0.00486202 | -1.22336 |

|              |               |            |          |
|--------------|---------------|------------|----------|
| NM_027453    | Btf3l4        | 0.0147885  | -1.2238  |
| NM_007711    | Clcn3         | 0.0112241  | -1.22387 |
| NM_007840    | Ddx5          | 0.011571   | -1.22444 |
| NM_001161782 | Trim32        | 0.0145031  | -1.2258  |
| NM_027356    | Ufsp1         | 0.0103498  | -1.22609 |
| NM_001039511 | Ivns1abp      | 0.00587129 | -1.2269  |
| NM_029368    | 1700029F09Rik | 0.0156361  | -1.22692 |
| NM_026949    | Cnot8         | 0.0136728  | -1.22775 |
| NM_025864    | Tmem206       | 0.00516958 | -1.2278  |
| NM_133724    | Cno           | 0.00466553 | -1.22793 |
| NM_001167767 | 1110057K04Rik | 0.0184144  | -1.22812 |
| NM_025901    | Polr3k        | 0.00929831 | -1.22921 |
| NM_183285    | Kctd2         | 0.0131587  | -1.23047 |
| NM_026635    | Fam96a        | 0.00105456 | -1.2306  |
| NM_001162941 | Mapre2        | 0.0128198  | -1.23242 |
| NM_026120    | 2410127L17Rik | 0.0198963  | -1.23435 |
| NM_197988    | 1190005I06Rik | 0.00806873 | -1.23508 |
| NM_025558    | Cyb5b         | 0.0141399  | -1.23627 |



|              |               |            |          |
|--------------|---------------|------------|----------|
| NM_028360    | Ttc19         | 0.00597677 | -1.23782 |
| NM_182841    | Tmem150c      | 0.0172416  | -1.23801 |
| NM_011220    | Pts           | 0.0110514  | -1.2385  |
| NM_001081226 | 2310009B15Rik | 0.0183622  | -1.23935 |
| NM_026940    | Ydjc          | 0.0192186  | -1.24086 |
| NM_009212    | Ighmbp2       | 0.00418811 | -1.24133 |
| NM_016957    | Hmgn2         | 0.00117134 | -1.24155 |
| NM_177684    | Zfp637        | 0.00941201 | -1.24167 |
| NM_007499    | Atm           | 0.0164454  | -1.24206 |
| NM_001161623 | Cdc45         | 0.00204015 | -1.2422  |
| NM_029211    | Rnf121        | 0.0167029  | -1.24306 |
| NM_178772    | Nceh1         | 0.0157254  | -1.24314 |
| NM_177066    | Tnni3k        | 0.00834977 | -1.24324 |
| NM_001115010 | Lin54         | 0.0176044  | -1.2433  |
| ---          | ---           | 0.0152528  | -1.24429 |
| NM_011137    | LOC100503933  | 0.00362977 | -1.24436 |
| NM_001081431 | Zfp498        | 0.0169391  | -1.2456  |
| NM_134123    | Rbm16         | 0.00873891 | -1.24563 |

|              |               |            |          |
|--------------|---------------|------------|----------|
| NM_009054    | Trim27        | 0.00454991 | -1.24623 |
| NM_172926    | Snx14         | 0.00157045 | -1.24775 |
| NM_023844    | Jam2          | 0.00928491 | -1.24781 |
| NM_172769    | Sc5d          | 0.0181849  | -1.24792 |
| NM_172644    | Dars2         | 0.0111837  | -1.24796 |
| NM_199016    | Enpp4         | 0.00310046 | -1.24866 |
| NM_030147    | Brd8          | 0.00428916 | -1.24904 |
| NM_001164574 | Kbtbd3        | 0.00964487 | -1.24927 |
| NM_001161737 | Siva1         | 0.0170945  | -1.24968 |
| NM_145823    | Pitpnc1       | 0.0158173  | -1.25013 |
| NM_001042623 | Phc1          | 0.0157333  | -1.25078 |
| NM_027423    | Polr3b        | 0.0163592  | -1.25103 |
| NM_026714    | Ccdc163       | 0.00609531 | -1.2523  |
| NM_027464    | 5730469M10Rik | 0.0199983  | -1.25275 |
| NM_029936    | Ddx10         | 0.00336299 | -1.25316 |
| NM_030004    | Cryl1         | 0.0141233  | -1.25654 |
| NM_029581    | Mtif3         | 0.0124369  | -1.25667 |
| NM_001164827 | Zfyve19       | 0.0161868  | -1.25672 |

|              |               |            |          |
|--------------|---------------|------------|----------|
| NM_001047435 | Pard6a        | 0.00590579 | -1.25674 |
| NM_001081195 | Arid4a        | 0.00876668 | -1.25706 |
| NM_145823    | Pitpnc1       | 0.0167393  | -1.2573  |
| NM_011327    | Scp2          | 0.00551552 | -1.25796 |
| NM_019785    | Actr10        | 0.00171814 | -1.25874 |
| NM_147220    | Abca9         | 0.00454301 | -1.25991 |
| NM_021511    | Rrs1          | 0.00917774 | -1.26126 |
| NM_021791    | Doc2g         | 0.0084799  | -1.26152 |
| NM_001168505 | Shoc2         | 0.00594837 | -1.26187 |
| NM_001110271 | Abhd14a       | 0.0023346  | -1.26267 |
| NM_001081065 | Zfp707        | 0.00323459 | -1.26298 |
| NM_175158    | Utp20         | 0.00131834 | -1.26338 |
| ---          | ---           | 0.00350722 | -1.2636  |
| NM_001013577 | 1110054005Rik | 0.00464441 | -1.26449 |
| NM_025652    | Gtf3a         | 0.0198952  | -1.26601 |
| NM_001159905 | Zfand2b       | 0.00969552 | -1.26669 |
| NM_001163557 | Ppfibp2       | 0.0184194  | -1.26748 |
| NM_001171052 | Mta3          | 0.01821    | -1.26832 |

|              |               |             |          |
|--------------|---------------|-------------|----------|
| NM_177894    | Fam154b       | 0.0122583   | -1.26868 |
| NM_001105667 | Dtymk         | 0.00900023  | -1.26915 |
| NM_026951    | Pex11c        | 0.00732156  | -1.26986 |
| NM_001035123 | Setd6         | 0.00136919  | -1.27261 |
| NM_001082553 | Rab27b        | 0.0189848   | -1.27339 |
| NM_029011    | Pyroxd2       | 0.000391113 | -1.27396 |
| NM_172753    | Csgalnact1    | 0.0166857   | -1.27651 |
| NM_026431    | 1810043G02Rik | 0.00293789  | -1.27674 |
| NM_172684    | Rsb1          | 0.0150906   | -1.27723 |
| NM_001042752 | Neo1          | 0.00665099  | -1.27897 |
| NM_026984    | Mll5          | 0.0123859   | -1.27964 |
| NM_019731    | Nme4          | 0.00310238  | -1.28029 |
| NM_019869    | Rbm14         | 0.0138859   | -1.28046 |
| NM_001161665 | Kif26b        | 0.0187413   | -1.28099 |
| NM_146236    | Tceal1        | 0.00883643  | -1.28149 |
| NM_172607    | Naprt1        | 0.00769668  | -1.28428 |
| NM_029609    | Lhpp          | 0.0156724   | -1.28459 |
| NM_145512    | Sft2d2        | 0.00286474  | -1.28775 |

|              |               |             |          |
|--------------|---------------|-------------|----------|
| NM_001145433 | 1810013D10Rik | 0.00764842  | -1.28899 |
| NM_025923    | Fancl         | 0.00208447  | -1.28974 |
| NM_001039351 | Nolc1         | 0.00374739  | -1.28988 |
| NM_023140    | Glr3          | 0.00233943  | -1.29008 |
| ---          | ---           | 0.0141091   | -1.2913  |
| NM_026442    | Cmc1          | 0.0134591   | -1.29169 |
| NM_018818    | Chm           | 0.00830198  | -1.29202 |
| NM_001159609 | Lrrc57        | 0.00292895  | -1.29319 |
| NM_133990    | Il13ra1       | 0.0177866   | -1.29433 |
| NM_009413    | Tpd52l1       | 0.0112585   | -1.29496 |
| NM_011643    | Trpc1         | 0.000322981 | -1.29541 |
| NM_011207    | Ptpn3         | 0.0117226   | -1.29688 |
| NM_001177995 | Prdm16        | 0.00112038  | -1.29703 |
| NM_001145899 | Slc15a2       | 0.00448038  | -1.29773 |
| NM_026494    | Ppcs          | 0.0135528   | -1.29823 |
| NM_025999    | Rnf141        | 0.00532095  | -1.30174 |
| NM_133821    | Phlpp1        | 0.00682709  | -1.30322 |
| ---          | 1810021B22Rik | 3.78E-05    | -1.30542 |

|              |               |            |          |
|--------------|---------------|------------|----------|
| NM_178693    | Coq4          | 0.0145928  | -1.3068  |
| NM_029629    | Fahd2a        | 0.0143256  | -1.30695 |
| NM_023322    | Zkscan14      | 0.00253996 | -1.31725 |
| NM_001001333 | Hexdc         | 0.019766   | -1.31744 |
| NM_001004361 | 5730494M16Rik | 0.00081817 | -1.31776 |
| NM_011131    | Pold1         | 0.00385521 | -1.31937 |
| NM_011749    | Zfp148        | 0.019481   | -1.3201  |
| NM_001081378 | Kidins220     | 0.011637   | -1.32044 |
| NM_001038703 | Gpr146        | 0.0154221  | -1.3221  |
| XM_003084677 | Zfp383        | 0.0080667  | -1.32232 |
| NM_026001    | Rnaseh2b      | 0.00531027 | -1.32247 |
| NM_080857    | Asb13         | 0.00193714 | -1.324   |
| NM_001162977 | Megf6         | 0.0117763  | -1.32749 |
| NM_001042671 | Gpcpd1        | 0.00655575 | -1.32784 |
| NM_029857    | Tmco4         | 0.0090207  | -1.32961 |
| NM_021477    | Rbfox1        | 0.0145522  | -1.3324  |
| NM_028040    | Rpusd4        | 0.00389296 | -1.33242 |
| NM_027827    | Afmid         | 0.00106233 | -1.33568 |

|              |               |            |          |
|--------------|---------------|------------|----------|
| NM_010219    | Fkbp4         | 0.00620267 | -1.33809 |
| NM_008584    | Meox2         | 0.0099827  | -1.34988 |
| NM_010191    | Fdft1         | 0.00945774 | -1.35025 |
| NM_194335    | Naif1         | 0.0142309  | -1.35044 |
| NM_028791    | Ftsjd2        | 0.00668919 | -1.354   |
| NM_026860    | Gkn3          | 0.0178676  | -1.35567 |
| NM_177700    | Atmin         | 0.0129755  | -1.36092 |
| NM_175367    | Ston2         | 0.0118527  | -1.36504 |
| NM_133740    | Prmt3         | 0.00846368 | -1.36666 |
| NM_178113    | Ncapd3        | 0.0126128  | -1.36784 |
| NM_009644    | Ahrr          | 0.0175727  | -1.3679  |
| NM_001161712 | Gcat          | 0.0195545  | -1.36853 |
| NM_028761    | Parn          | 0.00440813 | -1.3848  |
| NM_009871    | Cdk5r1        | 0.00130491 | -1.39007 |
| NM_001145876 | Slc25a44      | 0.0048081  | -1.39195 |
| NM_027335    | 2210016F16Rik | 0.00105174 | -1.39927 |
| NM_011552    | Tcof1         | 0.00263295 | -1.41234 |
| NM_009870    | Cdk4          | 0.014427   | -1.41705 |

|              |               |            |          |
|--------------|---------------|------------|----------|
| NM_001033453 | Pdp1          | 0.0018229  | -1.41943 |
| NM_153587    | Rps6ka5       | 0.0191221  | -1.43256 |
| NM_026408    | Sncap         | 0.0159854  | -1.43265 |
| XR_105935    | LOC100502834  | 0.00504972 | -1.43539 |
| NM_001039710 | Coq10b        | 0.0199263  | -1.44159 |
| XM_001473131 | 5033430I15Rik | 0.00778482 | -1.44681 |
| NM_019570    | Rev1          | 0.0121016  | -1.4563  |
| NM_027872    | Slc46a3       | 0.0141461  | -1.48837 |
| NM_027460    | Slc25a33      | 0.00450409 | -1.52851 |
| NM_172404    | Ccbl1         | 0.0110134  | -1.55587 |
